1 ***Wolbachia* control stem cell behavior and stimulate germline proliferation**  
2 **in filarial nematodes**

3

4 Authors

5 Foray Vincent<sup>1#</sup>, Pérez-Jiménez Mercedes M.<sup>1,2#</sup>, Fattouh Nour<sup>1</sup>, Landmann Frédéric<sup>1\*</sup>

6 # These authors contributed equally

7

8 Addresses

9 <sup>1</sup> CRBM, University of Montpellier, CNRS, France.

10

11 <sup>2</sup> Current address: Centro Andaluz de Biología del Desarrollo (CABD), Universidad Pablo de  
12 Olavide/CSIC/JA, Sevilla, Spain.

13 \*Correspondence: frederic.landmann@crbm.cnrs.fr

14

15 **Lead Contact, Frédéric Landmann (frederic.landmann@crbm.cnrs.fr)**

16

17 **SUMMARY**

18 Although symbiotic interactions are ubiquitous in the living world, examples of  
19 developmental symbioses are still scarce. We show here the crucial role of *Wolbachia* in the  
20 oogenesis of filarial nematodes, a class of parasites of biomedical and veterinary relevance.  
21 While the *Wolbachia*-depleted nematodes produce faulty embryos, we identified thanks to  
22 newly generated techniques the earliest requirements of *Wolbachia* in the germline. They  
23 stimulate its proliferation in a cell-autonomous manner, in parallel of the known key  
24 controllers, and not through nucleotide supplementation as previously hypothesized. We also  
25 found *Wolbachia* to maintain the quiescence of a pool of germline stem cells ensuring for  
26 many years a constant delivery of about 1400 eggs per day. The loss of quiescence upon  
27 *Wolbachia* depletion, as well as the disorganization of the distal germline suggest that  
28 *Wolbachia* are required to execute the proper germline stem cell developmental program in  
29 order to produce viable eggs and embryos.

30

31

32

## 33 INTRODUCTION

34

35 Symbiotic interactions between metazoans and prokaryotes have shaped the living world  
36 (Hurst, 2017; McFall-Ngai, 2015). Considered for a long time of a too overwhelming  
37 complexity to be studied at cellular and molecular levels, the study of symbiosis remained  
38 confined to the field of ecology, until developmental and evolutionary biologists took  
39 advantage of the available genomes and the "omics" revolution (McFall-Ngai et al., 2013).  
40 Bacterial and animal communities have coevolved to sometimes reach an intimate  
41 interdependency. Whether acquired from the environment or vertically transmitted through  
42 the female germline, symbionts have established a wide continuum of interactions with their  
43 hosts, from parasitism to mutualism. Understanding the mechanisms underlying these stable  
44 associations, and the benefits for each partners often appear challenging, but efforts are  
45 nonetheless redoubled when economical or biomedical interests are at stake (Slatko et al.,  
46 2014). Such is the case of symbioses involving *Wolbachia*, a genus of Gram-negative  
47 alphaproteobacteria present in a plethora of invertebrate hosts. Up to date the ever-growing  
48 number of *Wolbachia* strains has been classified into 14 supergroups by MLST sequencing,  
49 reflecting their diversity across taxa (Baldo et al., 2006). In terrestrial arthropods species,  
50 these facultative endosymbionts evolved sex-ratio distortion strategies to favor their vertical  
51 transmission through the female progeny (Werren et al., 2008). The discovery that *Wolbachia*  
52 from *D. melanogaster* newly introduced into mosquito vectors are able to interfere with the  
53 transmission of arboviruses contributed to the popularity of these bacteria (Kamtchum-  
54 Tatuene et al., 2016). Aside from these facultative interactions, the coevolution of *Wolbachia*  
55 with their host and their transovarian mode of transmission have led to developmental  
56 symbioses, where the symbionts have become necessary for the making of an egg. This was  
57 reported for the first time in *Asobara tabida*, a parasitic wasp relying on *Wolbachia* to achieve  
58 its oogenesis otherwise apoptotic (Dedeine et al., 2001). While a plethora of developmental  
59 symbioses probably awaits to be discovered, current evidences are still scarce. The *Vibrio*  
60 *fisheri*-squid symbiosis remains the most achieved comprehension of such interactions. The  
61 free-living bacteria harvested by the juvenile cephalopod allow the development the light  
62 organ they colonize, and both partners undergo developmental and transcriptional changes in  
63 response to the symbiosis (McFall-Ngai, 2014).

64

65 Because *Wolbachia* are still genetically intractable, most of the cell biology of the interaction  
66 with the host we know as well as our knowledge of their intracellular lifestyle derive mostly

67 from studies either in the fruit fly or in insect cell cultures (Ferree et al., 2005; Geoghegan et  
68 al., 2017). Very few *Wolbachia* effectors have been characterized to date, and restricted to  
69 interactions with insects (Beckmann et al., 2017; Lepage et al., 2017; Ote et al., 2016).  
70 Sometimes the complex mode of life of the host itself is an impediment to explore the basis of  
71 a symbiosis. This explains why our understanding of the filarial nematode-*Wolbachia*  
72 interaction at the cell level is still in its infancy, although discovered 40 years ago (Kozek,  
73 1977). These species of parasitic nematodes belong to the Onchocercidae family. Transmitted  
74 by blood feeding arthropods to a vertebrate host where they develop and live as adults in the  
75 lymph or the blood, they cause filariasis, the most debilitating tropical neglected diseases in  
76 humans, and a burden in animals, fatal in dogs and cats (McCall et al., 2008; Slatko et al.,  
77 2010). Genomic and phylogenetic studies support the occurrence of several independent  
78 associations of Onchocercidae with *Wolbachia*, followed by secondary losses, leading to  
79 current estimates of 37% of filarial species living in symbiosis with *Wolbachia* (Ferri et al.,  
80 2011). Yet all species infecting humans but one harbor *Wolbachia*. Antibiotic therapies  
81 revealed a mutualistic relationship between *Wolbachia* and filarial nematodes, since worms  
82 depleted of their symbionts have been described as sterile due to apoptosis in embryos, and  
83 present a longevity reduced from about 10 years to few months (Landmann et al., 2011;  
84 Taylor et al., 2010). This highlights a requirement of *Wolbachia* to allow embryonic  
85 development and to support the adult survival, consistent with their localization in the female  
86 germline and the somatic hypodermal chords. In absence of *Wolbachia*, apoptosis is the  
87 ultimate fate of developing embryos and worms stop releasing viable microfilariae, however  
88 females still produce embryos with a fraction of them displaying polarity defect phenotypes at  
89 early stages suggesting possible earlier requirements of the endosymbionts, i.e. during  
90 oogenesis (Landmann et al., 2014). Because of the transovarian transmission of *Wolbachia*,  
91 their abundance and tropism for the germline (Fischer et al., 2011; Landmann et al., 2010), we  
92 hypothesized they may regulate some fundamental aspects of the germline stem cell behavior  
93 and may subsequently affect the proliferation and the production of eggs in filarial species.

94  
95 We chose to explore this developmental symbiosis using *Brugia malayi*, a causative agent of  
96 human filariasis, because it is the sole filarial parasite infecting humans that can be raised in  
97 the laboratory with a surrogate rodent host. Both the *Wolbachia* and the worm genomes are  
98 sequenced and annotated, and artificial aposymbiotic worms can be obtained by antibiotic  
99 treatment under laboratory conditions (Foster et al., 2005; Ghedin et al., 2007). The  
100 tetracycline regimen used to deplete *Wolbachia* has been shown to have no direct effect on

101 the fertility of the worm when applied to the naturally *Wolbachia*-free *A. viteae* filarial  
102 species (Hoerauf et al., 1999).

103  
104 We developed new techniques of dissection, permeabilization and staining for these large and  
105 unwieldy nematodes, as well as imaging processing programs in order to characterize  
106 precisely their fruitful gametogenesis in whole-mount gonads, otherwise previously observed  
107 in cross-sections only. This allowed us to establish that ovaries contain a distal pool of  
108 hundreds of quiescent germline stem cells, which once activated proliferate while in transit  
109 along a mitotic proliferative zone made of about 3,000 nuclei, until commitment into the  
110 meiotic program. We found the distal tip cell to be dispensable to the germ cell proliferation,  
111 a marked evolutionary difference with the nematode *C. elegans*. Nonetheless the proliferation  
112 remained under the control of a Notch signaling pathway, possibly emanating from the distal  
113 somatic gonad, and under the control of *Wolbachia* in a cell-autonomous manner. The  
114 depletion of *Wolbachia* caused not only a reduced proliferation, but alleviated the germline  
115 stem cell quiescence, and disturbed the germline organization without triggering apoptosis,  
116 suggesting that the endosymbionts have become essential to execute the correct germ stem  
117 cell developmental program leading otherwise to a decreased production of potentially faulty  
118 oocytes.

119

120

## 121 **RESULTS**

122

### 123 **Depletion of *Wolbachia* leads to a decrease of germline cell proliferation**

124 *B. malayi* females possess two ovaries, and their distal parts are located in the posterior of the  
125 body. Males however display a single testis whose distal end lies in the anterior of the body  
126 (Figure 1A). Both females and males harbor *Wolbachia* in lateral thickenings of the somatic  
127 hypodermal tissues -the hypodermal chords-. While the endosymbionts are absent from the  
128 male testis, they occupy the female germline, with the highest titer in the distal ovaries  
129 (Figures 1B-1D, 38 bacteria/germline nucleus in average along the most distal 100µm). To  
130 explore the contribution of *Wolbachia* to the fertility of their host and their impact on the  
131 gametogenesis, we compared gonads from *Wolbachia*-depleted adult worms to their wild-type  
132 counterparts. The depletion is obtained by applying a standard protocol consisting in a 6-week  
133 tetracycline treatment followed by a 2-week clearance period in order to avoid any direct  
134 effect of the antibiotics (Figure S1). Instead of classical microscopy observations on body

135 cross sections obtained from paraffin-embedded worms, we developed a new set of  
136 techniques ultimately allowing us to access cell dynamics parameters during germline  
137 development. To assess the effect of *Wolbachia* depletion on the germline proliferation, we  
138 first stained ovaries with an anti-phospho histone 3 (PH3) antibody to reveal mitotic nuclei,  
139 and we imaged the distal ovary tips containing the PH3-positive nuclei (Figure 2B). We found  
140 an average loss of 32.5 % of PH3+ nuclei from wild-type to *Wolbachia*-depleted – *Wb(-)* –  
141 ovaries (Figure 2C). In order to elucidate the origin of a decrease in mitotic events, and gain  
142 insights into the defects caused by the *Wolbachia* depletion, we characterized the germline  
143 development in *B. malayi*.

144

### 145 **Germline nuclei in mitotic proliferative and meiotic differentiation zones are physically** 146 **separated**

147 Because of the similarities in gonad organization between nematodes belonging to the  
148 Secernentea, we established parallels between *B. malayi* and the experimental organism *C.*  
149 *elegans* whose germline development has been extensively studied (Hansen and Schedl,  
150 2013). In both species the somatic gonad is organized as a tube capped by a distal tip cell -  
151 DTC- acting as a germline stem cell niche (Figure S1). In *C. elegans*, the DTC signals to  
152 germline nuclei, organized as a syncytium, to proliferate. These nuclei then exit the phase of  
153 mitotic proliferation and commit to the meiotic differentiation, initiated with a meiotic S  
154 phase. To characterize the *B. malayi* proliferative zone (PZ), worms were *in vitro* incubated  
155 with the thymidine analog EdU to reveal nuclei in S phase. Gonads were subsequently stained  
156 with an anti-PH3, and mounted with a DNA dye to identify the zone of meiotic entry (Figure  
157 2D). The distal mitotic PZ corresponds to about one sixth of the entire ovary, and contains an  
158 average of 3000 nuclei (Figure 2A). Its proximal boundary was defined by the last PH3+  
159 nucleus and the first EdU+ nuclei from the meiotic S phase cluster (Figure 2D). We found  
160 that in *B. malayi* females and males, nuclei in meiotic S phase are physically separated from  
161 nuclei in proliferation. This sharp transition to the meiotic S phase despite a high number of  
162 nuclei in the PZ suggests a tight spatiotemporal regulation of the differentiation mechanisms.  
163 These nuclei in S phase overlap with nuclei in the pachytene stage, in which synapsed  
164 chromosomes are clearly visible (Figures 2D and E; Figure S2).

165

### 166 **The germline undergoes transit amplifying divisions in the proliferative zone**

167 To establish how the germline divides along the PZ, wild-type worms were exposed to EdU  
168 for 72 hours in *in vivo* conditions, in order to reveal altogether replicative and quiescent

169 nuclei. Only proliferative nuclei in the PZ and those in meiotic S phase incorporate EdU.  
170 Therefore the number of EdU+ nuclei beyond the meiotic S phase area gives access to the  
171 kinetics of germ cells production. We localized the meiotic S phase area based on several  
172 criteria -its maximum EdU incorporation concomitant with nuclei displaying a chromatin  
173 typical of the pachytene stage, following the last PH3+ nuclei - ( $n > 10$ , Figure 2F). The  
174 number of postmitotic EdU+ nuclei released from the meiotic S phase allowed us to estimate  
175 a yield of at least 700 germ cells produced per day per ovary. To understand whether they  
176 mainly arose from dispersed and actively dividing germline stem cells –GSCs- along the PZ,  
177 or from a distal pool of GSCs giving rise to daughters in transit amplification, we used the  
178 EdU fluorescence level to explore the germline nuclei cycling. To this end, we set up the  
179 imaging conditions using as a detection level threshold the fluorescence associated with the  
180 most proximal meiotic EdU+ cluster (Figure 2F, yellow bracket). This cluster reflects a single  
181 round of replication, undergone during the meiotic S phase only (Figure 2F inset #5). We  
182 found the distal area of the ovary to contain mostly EdU-negative cells, suggesting the  
183 presence of a quiescent pool of GSCs (Figure 2F inset #1). The fluorescence increase was  
184 then gradual along the 1mm-long PZ, from a basic level corresponding to a first round of  
185 replication and more (inset #2) to higher levels (insets #3 and #4). The quantification of the  
186 fluorescence intensity confirmed that the amount of incorporated EdU in the PZ goes beyond  
187 a single replicative cycle (Figure 2G). Yet the level of EdU incorporation appeared variable  
188 between nuclei close to the PZ exit (inset #3). Altogether these data suggest that i) the distal  
189 part is enriched in quiescent GSCs; ii) nuclei commit to differentiation in the proximal PZ  
190 after a variable number of transit amplification rounds.

191

### 192 ***Wolbachia* control the size of the proliferative pool in a cell-autonomous manner**

193 We then explored the impact of *Wolbachia* depletion on the PZ, with the tools introduced  
194 above. Consistent with the reduced number of mitotic nuclei in absence of endosymbionts, we  
195 observed an average decrease of both the PZ length and its nuclear content by 33% compared  
196 to the wild-type (Figures 3A and 3B). We next wondered which of the soma or germline  
197 populations of *Wolbachia* is crucial to ensure a proper pool of proliferative nuclei. Since the  
198 antibiotic regimen wipes out *Wolbachia* from the somatic hypodermis of both female and  
199 male worms, but only from the female germline because the testis is devoid of  
200 endosymbionts, we reasoned as follows: If the proliferation of the male germline happens to  
201 be affected upon *Wolbachia* depletion, the somatic *Wolbachia* are very likely to participate to  
202 the germline proliferation. Conversely, if the male PZ does not appear affected, the role of

203 somatic *Wolbachia* is probably insignificant in this regard, while the endosymbionts present  
204 in high titer in the female germline are very likely to be responsible for the enhanced  
205 proliferation. Comparison of germlines from wild-type versus *Wb(-)* males supports the latter.  
206 Neither the PZ length nor the number of nuclei in the testis PZ were affected (Figures 3C and  
207 S2C). To further confirm an overall absence of defects in spermatogenesis upon *Wolbachia*  
208 depletion, we followed the meiotic divisions and the sperm maturation in *Wb(-)* males and  
209 found no difference with the wild-type counterparts (Figure S2D). Incidentally, this cellular  
210 analysis shows that the tetracycline treatment itself does not directly cause germline defects,  
211 and altogether these data strongly suggest that *Wolbachia* support the female germline  
212 proliferation in a cell-autonomous manner.

213

### 214 ***Wolbachia* determine the transit amplification strength**

215 Several mechanisms, not necessarily mutually exclusive, could account for a reduced number  
216 of mitotic nuclei in the female PZ, including an increase in distal apoptosis, a slower cell  
217 cycle, or less rounds of division associated with a precocious switch to meiotic differentiation.  
218 First, we scored the apoptotic nuclei in the PZs as the typically small condensed, PH3-  
219 negative pyknotic nuclei (Figures 3D and S3A). The comparison of apoptotic indexes of wild-  
220 type versus *Wb(-)* ovarian PZs showed no significant difference, and the same conclusion was  
221 reached for the testes (Figure 3D). Since the data were collected from worms sacrificed 8  
222 weeks after the beginning of the antibiotic treatment of the rodent host, we envisaged that  
223 apoptosis might have occurred earlier and i.e. reduced the pool of GSCs. We therefore  
224 examined PZs at day 4 of host treatment, since apoptosis was previously reported in proximal  
225 ovaries and uteri at 4 days of *in vitro* treatment (Landmann et al., 2011). No significant  
226 apoptosis was detected (Figure S3B), and we concluded that the number of germline nuclei in  
227 the PZ is not reduced by an increase of cell death.

228 Second, a slower cell cycle in the PZ could in theory explain a smaller pool of PH3+  
229 proliferative nuclei, shifting the balance toward differentiation. The mitotic indexes of wild-  
230 type and *Wb(-)* PZs appeared however similar, suggesting that proliferative cells are likely to  
231 cycle with the same speed (Figure 3E).

232 Last, the density of nuclei along the PZ was carefully examined. An estimate per segments of  
233 50  $\mu\text{m}$  revealed a constant average increase, similar in wild-type and *Wb(-)* PZs (Figure 3F).  
234 However the nuclear density in the last proximal segments of wild-type PZs showed a sharp  
235 increase in cell counts, suggesting a zone favorable to transit amplification. This zone is  
236 absent from *Wb(-)* PZs. Because the PZ lengths are naturally variable among same age

237 females, we also scored the nuclear density as well as the distribution of mitotic events using  
238 heat map representations of each individual PZ (Figures S4A-S4B). These analyses confirmed  
239 the correlation between mitotic events and nuclear densities, and the increasing occurrence of  
240 mitotic events towards the proximal end of the wild-type PZs, clearly affected in *Wb(-)* PZs.  
241 Taken together, our data indicate that the absence of *Wolbachia* from the female germline  
242 does not result in distal apoptosis, nor in a change in the global cell cycle speed. Rather, the  
243 truncation of the transit amplification suggests that a role for the endosymbionts is to enhance  
244 the germline proliferation by increasing the mitotic cycling in the proximal part of the  
245 proliferative zone.

246

### 247 **The *B. malayi* female germline proliferation results from both Notch signaling pathway** 248 **and *Wolbachia* inputs**

249 Since *Wolbachia* modulate the level of germline proliferation, we wondered whether  
250 the symbionts operate through subversion of a host signaling pathway promoting the  
251 proliferation, or in parallel. In *C. elegans*, both specific developmental regulators as well as  
252 more ubiquitous cell cycle regulators have been identified to play key roles to sustain the  
253 proliferation (Crittenden et al., 1994; Fox et al., 2011; Lee et al., 2016). However most of the  
254 proliferation is under the control of a Notch pathway whose strength determines the PZ size  
255 (Austin and Kimble, 1987; Kimble, 2005). The transmembrane DSL ligand expressed by the  
256 DTC is delivered through long cell processes to the distal germline. Upon activation, the  
257 transmembrane Notch receptor is cleaved and translocated to the germline nuclei, promoting  
258 the expression of FBF RNA-binding proteins which prevent the meiotic differentiation  
259 (Lamont et al., 2004). We first explored the role of the DTC in the proliferation control by  
260 performing its laser ablation (Figure S5A). Only one DTC per female was ablated prior to  
261 comparative pair analyses. The count of PH3+ nuclei 24 hrs after DTC ablation showed no  
262 differences between ovarian pairs (Figures S5B-D) suggesting that in filarial nematodes the  
263 DTC is dispensable for the germline proliferation. This prompted us to assess the evolutionary  
264 conservation of the Notch pathway involvement in the germline proliferation control. To this  
265 end drug inhibition assays were carried out. *B. malayi* females were subjected to the potent  
266 gamma secretase inhibitor DBZ for 24 hours *in vitro*, that acts by preventing the cleavage of  
267 the Notch receptor (Fuwa et al., 2007). PH3+ nuclei counts revealed that although the loss of  
268 proliferation increased with higher doses of inhibitor (Figure 4A grey box plots), proliferation  
269 persisted specifically in the most proximal PZ part (Figure 4B wild-type). These cycling  
270 nuclei could either represent the last Notch-dependent proliferative nuclear pool, in which



271 Notch downstream effectors are still active after the 24hr-long drug treatment, or a Notch-  
272 independent cycling. To test if this proximal cycling is promoted by *Wolbachia*, we exposed  
273 in parallel *Wb(-)* females to the same drug regimen. In that case, the germline proliferation  
274 was almost completely abrogated compared to the wild-type with a 100 $\mu$ M DBZ treatment  
275 (Figure 4A orange box plots, and Figure 4B), suggesting a *Wolbachia*-dependent proliferation  
276 control in the proximal PZ. To check if *Wolbachia* promote proliferation through a  
277 modulation of the Notch signaling pathway or independently, we identified - by reciprocal  
278 BLASTs with *C. elegans*- putative orthologs for key players of this pathway, and we  
279 measured the transcripts levels in wild-type versus *Wb(-)* ovaries by quantitative PCR (Figure  
280 4C). We failed to detect any changes, supporting the idea that *Wolbachia* act independently of  
281 the Notch signaling pathway to promote proliferation. We then extended the qPCR analyses  
282 of ovaries to the orthologs of cell cycle regulators known to support the germline proliferation  
283 in *C. elegans* (i.e. *Bma cycline E*, *cdk2* and *cdc25*, see Figure S6 and Table S1). Again, no  
284 significant changes in expression levels of genes were detected. Altogether, this set of data  
285 indicates that i) a Notch ligand is likely to be expressed by other somatic cells than the DTC,  
286 ii) a Notch signaling pathway does control germline proliferation in *B. malayi*, iii) *Wolbachia*  
287 enhance the proliferation independently of the Notch pathway or other tested positive  
288 regulators of the germline division.

289  
290

### 291 ***Wolbachia* depletion does not induce a critical shortage of nucleotides**

292 Since we did not identify any proliferation key players to be affected by the loss of  
293 *Wolbachia*, we looked at the nucleotide levels. Cell proliferation demands an important  
294 nucleotide supply, and the available pyrimidine pool of nucleotides was recently shown to be  
295 critical to sustain the germline proliferation in *C. elegans* (Chi et al., 2016). In addition, a  
296 genomic analysis of *Wbm Wolbachia* indicates that these intracellular bacteria have retained  
297 the metabolic capabilities to *de novo* synthesize nucleotides (Foster et al., 2005). To test the  
298 hypothesis of this metabolic contribution as one of the possible bases of the mutualism with  
299 the worm, nucleotides levels were measured in female worms. Because of the large amount of  
300 bacteria in somatic and germinal tissues, we hypothesized that the symbionts depletion could  
301 *de facto* induce a corresponding decrease in global nucleotide pools. We therefore added a  
302 filarial nematode species naturally devoid of *Wolbachia*, *Acanthocheilonema viteae*, as a  
303 control (Figure 5). While ATP and ADP levels were above the upper threshold in our  
304 calibration conditions to be reported, a significant decrease of all other nucleotides was rarely

305 measured between wild-type and *Wolbachia*-depleted *B. malayi* females. Whenever observed  
306 (i.e. for GMP and GDP), the pools were similar between *Wb(-) B. malayi* and *A. viteae*,  
307 suggesting that these concentrations are enough to sustain fertility and survival. Moreover, the  
308 variations never exceeded a two-fold range, while pathological states associated with  
309 nucleotide metabolism defects present much higher disturbances in the nucleotides levels  
310 (Bester et al., 2011; Mathews, 2015). Altogether, these data suggest that the mutualism  
311 between *Wolbachia* and the filarial host is unlikely to involve a nucleotide supply of bacterial  
312 origin.

313

### 314 ***Wolbachia* control germline stem cells behavior and organization.**

315 We wondered if *Wolbachia* influence would also extend to the GSCs. Although there are no  
316 specific markers for this cell type in nematodes, we took advantage of the identification of a  
317 quiescent pool of distal cells, *de facto* GSCs, spanning over the first 150  $\mu\text{m}$  (Figures 1 and  
318 S4). To check a possible effect of *Wolbachia* on the GSC quiescence, and because of the rare  
319 occurrence of mitotic events in this zone, we incubated wild-type and *Wb(-)* females with  
320 colchicine, in order block and accumulate mitotic events (Figure 6A). We indirectly  
321 characterized the quiescence by scoring the PH3-positive nuclei over the most distal 150 $\mu\text{m}$ ,  
322 in three adjacent 50  $\mu\text{m}$ -long segments (Figures 6A and 6B). We found in wild-type ovaries a  
323 gradient of division events, indicating the presence of more quiescent nuclei towards the distal  
324 tip. A laser ablation experiment of the DTC followed by a colchicine incubation ruled out a  
325 role of this cell in the quiescence control (Figure S7A). The observation of *Wb(-)* ovaries  
326 revealed that the GSCs divide on average 4.77 times more along the first 50  $\mu\text{m}$  in absence of  
327 *Wolbachia* than in control ovaries, twice more in the second segment, and 1.41 more in the  
328 last segment. Additional *in vivo* EdU incorporation experiments revealed similarly an average  
329 fold change of GSCs in S phase of respectively 4.03; 2.95 and 1.32 in the same three  
330 segments in *Wb(-)* ovaries compared to wild-type ovaries (Figures S7B and S7C). Altogether  
331 these data indicate that the germline stem cells quiescence is controlled by *Wolbachia* in *B.*  
332 *malayi*.

333 Last, we explored if other GSC behavioral traits could be affected by the loss of the  
334 endosymbionts. We took a closer look at the rachis and the distal nuclear distribution. The  
335 germline syncytium is organized as a single layer of cortical nuclei forming an actin-rich  
336 central canal in wild-type PZs (Figure 6C). The absence of *Wolbachia* affected the rachis  
337 structure that appeared very often disorganized, larger, and branched. This was correlated  
338 with a disorganization of the distal nuclear layer (i.e. Figure 6C, white inset in *Wb(-)* distal

339 part), indicating that the GSCs behavior was perturbed. We concluded that the *Wolbachia*  
340 endosymbionts are necessary to achieve a correct germline stem cell developmental program  
341 in the filarial host.

342

## 343 **DISCUSSION**

344

345 In this study, we demonstrate that a germline development goes awry without the presence of  
346 intracellular bacteria. In filarial nematode species living in mutualism with *Wolbachia*, both  
347 the long-term survival and the fertility of the host depend on the endosymbionts. Although  
348 they can live for months without *Wolbachia*, the infertility occurs following the  
349 endosymbionts depletion (Hoerauf et al., 1999). While it was previously established that the  
350 *Wolbachia* depletion eventually triggers apoptosis during embryogenesis and sometimes  
351 during late oogenesis in proximal ovaries (Landmann et al., 2011), nothing was known about  
352 the influence of these bacteria during early oogenesis. We circumvented technical obstacles to  
353 characterize the early oogenesis of these unwieldy nematodes. This allowed us to define with  
354 a fine scale spatiotemporal resolution the contribution of *Wolbachia* to discrete events during  
355 the germline proliferation in *B. malayi* (summarized in Figure 7). Specifically, we found the  
356 most distal GSCs to be in a quiescent state that depends on *Wolbachia*. This asymmetric  
357 enrichment of quiescent stem cells in the PZ suggests that the increasing number of mitotic  
358 events along the PZ reflects a transit amplification resulting mainly from the division of a  
359 distal pool of active GSCs. While the proliferation partially depends upon a Notch signaling  
360 pathway, our results show that the *Wolbachia* present in the germline enhance the mitotic  
361 events in a cell autonomous manner. In addition, the distal-most defects induced by the loss of  
362 *Wolbachia* suggest an active participation of the endosymbionts in the proper maintenance of  
363 the female germline stem cell fate.

364

365 Understanding how *Wolbachia* influence the germline implies to know to some extent their  
366 host's peculiar biology. Filarial nematodes and *C. elegans* differ by their lifestyles and are  
367 phylogenetically distant enough (parasitic from clade III, and free-living from clade V  
368 respectively (Blaxter et al., 1998)) to consider the latter one only as a starting point. This  
369 study reveals unique features of *B. malayi* oogenesis related to its parasitic lifestyle. We  
370 estimate a female to produce about 1400 eggs per day, resulting in as many microfilariae  
371 released in the blood of the vertebrate host on a daily basis. These long-lived worms can  
372 actively reproduce for 5 to 8 years (Taylor et al., 2010). A lower estimate of 1.3 million eggs

373 per ovary is therefore produced during a lifetime. To face such a demand, *B. malayi* possesses  
374 a gigantic proliferative zone made of about 3,000 nuclei. If these nuclei were all equivalent in  
375 proliferative properties, each would divide more than 400 times. While the very short-lived *C.*  
376 *elegans* counts only 200 to 250 actively cycling nuclei in the PZ (Crittenden et al., 2006), the  
377 presence in *B. malayi* of hundreds of GSCs in quiescence associated with a transit  
378 amplification phase is likely to reflect an alternative strategy to protect the germline. It is  
379 indeed crucial for stem cells to prevent accumulation of DNA replication-dependent  
380 mutations. To this end, only a fraction of GSCs transiently divide to give rise to transit  
381 amplification cells, likely to be gradually replaced by fresh stem cells from the quiescent  
382 distal pool. Which cells control the proliferation and the quiescence is not clear yet. In *C.*  
383 *elegans*, the DTC promotes the gonad migration and morphogenesis during larval  
384 development (Wong and Schwarzbauer, 2012), in addition to serve as a niche producing the  
385 Notch ligand controlling the proliferation in the adult germline (Austin and Kimble, 1987;  
386 Kimble and White, 1981; Lee et al., 2016). Our laser ablation experiments show that in *B.*  
387 *malayi* the germline proliferation does not depend on the DTC. Yet its reliance on a Notch  
388 signaling revealed by a gamma-secretase inhibition assay indicates that other somatic cells  
389 must provide the ligand. While the *C. elegans* DTC has been proposed to deliver the Notch  
390 ligand through cell processes forming a plexus running in between the distal germline (Byrd  
391 et al., 2014), the scale of oogenesis in filarial nematodes may rely on broader somatic sources  
392 of signal, i.e. the distal sheath cells. In fact, *C. elegans* sheath cells show different properties  
393 along the gonad and the most distal ones participate to the larval germline proliferation  
394 (Killian and Hubbard, 2005; McCarter et al., 1997). Moreover It was shown that the  
395 *Wolbachia* tropism for the *Brugia* germline is limited to the most distal sheath cells, through  
396 which the symbionts enter the gonad, suggesting different somatic cell properties along the  
397 gonad (Landmann et al., 2012). It is likely that in adult *B. malayi*, distal sheath cells support  
398 proliferation, while the main function of the DTC would remain to lead the gonad migration  
399 during development. We established that the DTC does not control the GSC quiescence. It  
400 also seems unlikely that a Notch signaling pathway would regulate quiescence since in *C.*  
401 *elegans* facultative stem cell quiescence induced by food restriction is independent of Notch  
402 (Seidel and Kimble, 2015).

403

404 Being vertically transmitted through the female germline, the *Wolbachia* have become master  
405 manipulators of their hosts' reproduction machineries to ensure their transmission to the next  
406 generation and invade a host population (Zug and Hammerstein, 2014). Facultative

407 *Wolbachia* have been shown to stimulate the egg production in a *Drosophila* species by  
408 enhancing the GSCs division together with an inhibition of apoptosis in the germline (Fast et  
409 al., 2011). In that case, their presence in the GSC niche was proposed to enhance GSCs  
410 division through a non cell-autonomous mechanism. We describe here a different mechanism  
411 of germline division enhancement. The *Wolbachia* living in mutualism with *B. malayi* do not  
412 target the DTC, and are absent or poorly present in the surrounding distal somatic sheath  
413 cells. Rather, they seem to act in a cell-autonomous manner in the female nematode germline.  
414 They do not influence the proliferation by a modulation of apoptotic levels in the PZ. Upon  
415 their depletion, a third of the cycling nuclei is lost, reflected accordingly in the number of  
416 nuclei in the PZ. The mitotic index is therefore not influenced by the presence of the  
417 symbionts, suggesting that *Wolbachia* are unlikely to modify the cell cycle.

418 Two scenarios not necessarily mutually exclusive, and developed hereafter, could explain  
419 how *Wolbachia* support the germline proliferation. First, *Wolbachia* could participate to the  
420 GSC fate maintenance. Second, the symbionts could stabilize the mitotic proliferation stage  
421 and delay the commitment into meiosis.

422 In absence of *Wolbachia*, the GSC quiescence is heavily perturbed, demonstrating a clear role  
423 of *Wolbachia* in its maintenance. Beyond the observed quiescence alteration, *Wolbachia*  
424 depletion could induce more global defects in GSC fate maintenance, that would explain not  
425 only the ectopic divisions occurring in the most distal part of the ovary, but also the disturbed  
426 spatial organization of these nuclei correlated with a misshapen rachis. A reduction of GSC  
427 self-renewal upon division would lead to a reduction of the proliferative pool.

428 We also show that upon a drug-induced Notch signaling inhibition for 24 hours, a fraction of  
429 nuclei still proliferates in the proximal PZ. This remaining proliferation is lost when the  
430 *Wolbachia* are removed. Although our candidate approach based on orthologs of key  
431 controllers of the *C. elegans* germline proliferation failed to identify a potential host signaling  
432 mechanism by which *Wolbachia* could enhance this proximal proliferation, it however  
433 suggested that the symbionts act in parallel of the Notch signaling pathway.

434

435 The still mysterious interdependency between *B. malayi* and its symbiotic *Wolbachia* strain  
436 *Wbm* has been hypothesized to rely on the metabolic capabilities of each partner (Fenn and  
437 Blaxter, 2007; Foster et al., 2005). *Wbm* have retained complete pathways to synthesize  
438 purines and pyrimidines, and could potentially supplement the host pool. We tested their  
439 relevance in the ovary, since i) the germline is the only proliferative tissue in the adult female,  
440 in addition to the embryogenesis, both demanding in nucleotides, and ii) while only a handful

441 of *Wolbachia* is found in developing embryos, limited to few specific blastomeres (Landmann  
442 et al., 2010), their titer is much greater in the ovarian PZ, and therefore more likely to exert an  
443 influence on the germline proliferation, shown to depend on the available pool of nucleotides  
444 in *C. elegans* (Chi et al., 2016). We did not find supporting evidence of such a dependency  
445 since nucleotide pools are not reduced in *Wb*-depleted females beyond their normal  
446 concentrations in *A. viteae*. The idea that synthesis pathways, missing or partially missing in  
447 the host would be complemented by *Wolbachia* has also been seriously undermined by the  
448 publication of the *Loa loa* genomics, a *Wolbachia*-free filarial nematode species (Desjardins  
449 et al., 2013). Despite the lack of the symbionts, *Loa loa* does not present additional metabolic  
450 pathways compared to *B. malayi*, suggesting more subtle mechanisms underlying the  
451 symbiotic association.

452  
453 In *C. elegans*, the self-renewal of the GSCs together with the germline mitotic proliferation  
454 are maintained through Notch signaling-dependent mechanisms that essentially operate  
455 through post-transcriptional repression of meiotic differentiation regulators thanks to the RNA  
456 binding proteins FBFs (Crittenden et al., 2002; Lamont et al., 2004). All these regulators are  
457 conserved broadly and are very likely to act in the control of germline proliferation in filarial  
458 nematodes. Our data reveal that the *Wolbachia* depletion results in a global decrease of  
459 germline proliferation with a loss of GSC quiescence. The two phenotypes triggered by the  
460 depletion of *Wolbachia* (i.e. the global decrease of germline proliferation and the loss of GSC  
461 quiescence) may share the same origin. Defects in GSC fate maintenance would force the  
462 distal nuclei to exit quiescence and eventually would lead to a loss of self-renewal, reducing  
463 the pool of proliferative nuclei.

464 The addition of *Wmel Wolbachia* strain to their natural host *D. melanogaster* has been shown  
465 to rescue germline defects in *Sex-lethal* mutants by restoring GSCs maintenance through the  
466 effector TomO, acting at the *nanos* mRNA level to increase its translation and support the  
467 GSC fate (Ote et al., 2016; Starr and Cline, 2002). Although TomO is not conserved in *Wbm*,  
468 this strain also harbors a functional type IV secretion system releasing bacterial effectors in  
469 the host (Li and Carlow, 2012). We can speculate that *Wolbachia* may interfere at the  
470 translational level to participate to the repression of the meiotic differentiation. In addition,  
471 because all embryos before morphogenesis, and sometimes cellularized oocytes in the most  
472 proximal ovary eventually enter apoptosis, it is possible that *Wolbachia* became essential to  
473 ensure a correct oogenesis developmental program, leading otherwise to cell death. For  
474 instance, polarity defects observed in *Wb(-)* early embryos could result from earlier defects

475 during oogenesis (Landmann et al., 2014). Intracellular pathogens have been shown to  
476 modulate host gene expression to their advantage through epigenetic modulations (Bierne et  
477 al., 2012). Whether this developmental symbiosis, leading otherwise in the absence of  
478 *Wolbachia* to defects from the GSCs to the early *B. malayi* embryo is under a symbiont-  
479 controlled epigenetic program will be the focus of future studies.

480

#### 481 **AUTHOR CONTRIBUTION**

482 V.F., M.M.P.J. and F.L. conceived experiments, performed formal analyses and data  
483 presentation. V.F., M.M.P.J. and N.F. performed experiments. F.V. and L.F. wrote the  
484 manuscript.

485

#### 486 **ACKNOWLEDGMENTS**

487 MetaToul (Metabolomics & Fluxomics Facilities, Toulouse, France, [www.metatoul.fr](http://www.metatoul.fr),  
488 MetaboHUB-ANR-11-INBS-0010) and its staff members are gratefully acknowledged for  
489 carrying out metabolome analyses. We are grateful to NIH/NIAID Filariasis Research  
490 Reagent Resource Center ([www.filariasiscenter.org](http://www.filariasiscenter.org)) for providing *B. malayi* and *A. viteae*  
491 specimens. We thank V. Georget and S. Lachambre from Montpellier RIO Imaging for  
492 microscopy facilities and their technical support for image analyses. We thank Pascale  
493 Cossart for critical advice. We are also grateful to Coralie Martin for advice on filarial  
494 nematode rearing techniques. This work was supported by the « Fondation pour la Recherche  
495 Médicale » (ARF20150934088) and the ATIP-Avenir program.

496

497

#### 498 **MAIN FIGURE TITLES AND LEGENDS**

499

500 **Figure 1 *Wolbachia* are present in the hypodermal chords of both *B. malayi* male and**  
501 **female worms but are restricted to the female germline.**

502 (A) Localization of the female ovaries and the male reproductive system in pink on bright  
503 field micrographs of worms, with arrowheads indicated the distal part of the gonads. Yellow  
504 arrows point to the anterior part of the worms. (B) Schemes showing cross-sections of adult  
505 worms and *Wolbachia* -magenta foci- distribution. (C) Confocal images of an ovary distal tip  
506 (top), a hypodermal chord -middle-, and a testis distal tip -bottom-, revealing *Wolbachia* -  
507 magenta-, host nuclei -blue- and actin -green, see material and methods-. White arrows point  
508 to the Distal Tip Cell –DTC-, acting as a germline stem cell niche in nematodes. Scale bars =

509 1mm (A) and 10  $\mu\text{m}$  (C). (D) *Wolbachia* density in the distal ovary, observed as propidium  
510 iodide foci per host nuclei as a function of length expressed in micrometers.

511

512 **Figure 2 Effect of *Wolbachia* depletion on the germline proliferation and**

513 **characterization of the proliferative zone in the ovary of *B. malayi*.**

514 Confocal images of (A) A dissected ovary stained with DAPI in its multiply folded natural  
515 conformation. The yellow arrow indicates the DTC. The narrow oviduct ends the ovary -  
516 bottom right-. (B) Full Z projection of confocal images of digitally linearized distal ovary parts  
517 from wild-type and *Wolbachia*-depleted females, stained to reveal DNA -DAPI in grey-, and  
518 mitotic nuclei - phosphorylated histone H3, "PH3" in magenta. Scale bar = 50  $\mu\text{m}$ . (C)  
519 Quantification of the mitotic proliferation expressed as the number of phospho-histone 3 -  
520 positive nuclei -PH3 in 21 wild-type and 29 *Wolbachia* (-) ovaries respectively. Bold line:  
521 median; box: lower and upper quartiles; whiskers: smallest and largest non-outlier  
522 observations. (D) Z projection of confocal images of a digitally linearized distal ovary part  
523 corresponding to the green box in (A), from a female incubated in EdU for 8 hours and  
524 stained to reveal DNA -DAPI, grey-, EdU incorporation -yellow- and mitotic nuclei - PH3,  
525 magenta-. (E) Enlargements of DAPI-stained areas indicated in (D). In the blue box are  
526 shown nuclei -i.e. outlined in yellow- close to the DTC -yellow arrow-, and in the red box  
527 nuclei in the pachytene stage where synapsed chromosomes are visible. Foci revealed by  
528 DAPI in between nuclei are *Wolbachia*. (F) Confocal images of a dissected ovary after a  
529 72hr-long EdU incubation and stained with the anti- PH3. Color codes as in (D). The position  
530 of the insets along the ovary are indicated by white boxes. (G) Quantification of the EdU  
531 fluorescence intensity along the ovary presented in (F). The black dotted line corresponds to  
532 the maximum intensity threshold for one complete round of replication, the red dotted line  
533 separates the PZ from the entry into meiosis as indicated in (F). Scale bars = 500  $\mu\text{m}$  (A), 50  
534  $\mu\text{m}$  (B,D), and 5  $\mu\text{m}$  (E).

535

536 **Figure 3 *Wolbachia* depletion affects the *B. malayi* female germline proliferative zone, in**  
537 **an autonomous manner.**

538 (A) Distal part of gonads dissected from wild-type and *Wolbachia*-depleted *B. malayi*  
539 females, stained with DAPI -grey-, and EdU -yellow- as well as PH3 -magenta-. The green  
540 dotted lines mark the limit of the PZs. Scale bar on images and scale bar unit on the ruler = 50  
541  $\mu\text{m}$ . (B) Length of the PZ and nuclear counts in wild-type and *Wolbachia*-depleted conditions  
542 in ovaries -top graphs- and (C) testes -bottom graphs-. (D) Apoptotic indexes in the PZ of



543 ovaries -left- and testes -right- from wild-type and *Wolbachia*-depleted worms. (E) Mitotic  
544 index in the ovarian PZ of wild-type and *Wolbachia*-depleted females. For (B) to (E), bold  
545 line: median; box: lower and upper quartiles; whiskers: smallest and largest non-outlier  
546 observations; dots: outliers. (F) Density of nuclei by segments of 50 $\mu$ m along the ovaries of  
547 wild-type and *Wolbachia*-depleted worms.

548

549 **Figure 4 *Wolbachia* promote proliferation independently of the Notch signaling**  
550 **pathway.**

551 (A) Number of PH3<sup>+</sup> nuclei counted in PZ from *B. malayi* females, wild-type or *Wb*-depleted,  
552 incubated for 24 hrs with either DMSO -control-, 10 or 100M DBZ. (B) Confocal images of  
553 distal ovaries from wild-type or *Wb*-depleted females incubated for 24 hrs in 100  $\mu$ m DBZ,  
554 stained with DAPI -grey- and PH3 -magenta- (C) qPCR experiments on *B. malayi* genes  
555 whose orthologs are involved in the *C. elegans* Notch signaling pathway (*lag* ligands; *glp-1*  
556 receptor, *fbf-1* a Notch pathway downstream target).

557

558 **Figure 5 Influence of *Wolbachia* on the nucleotide levels.**

559 Amounts of various nucleosides mono-, di-, and triphosphates, expressed in pmol/mg of fresh  
560 female worms, in wild-type *B. malayi* -grey-; *Wolbachia*-depleted *B. malayi* -orange-; or *A.*  
561 *viteae* -white- species.

562

563 **Figure 6 The loss of *Wolbachia* modifies germline stem cells features.**

564 (A) Confocal acquisitions of digitally linearized distal ovaries from wild-type and *Wolbachia*-  
565 depleted *B. malayi* females incubated *in vitro* for 4 hours in presence of colchicine 1mM, and  
566 stained with DAPI -grey- and an anti-PH3 -magenta-. The 50  $\mu$ m long segments are marked  
567 by a green dotted line. Scale bars = 50  $\mu$ m. (B) Number of PH3-positive nuclei counted in the  
568 most distal 0 to 50  $\mu$ m and 0 to 150  $\mu$ m-long segments of ovaries from wild-type and  
569 *Wolbachia*-depleted females. (C) Distal parts of ovaries double stained for DNA (with DAPI -  
570 blue-, staining mainly the host nuclei, and propidium iodide -magenta- revealing the  
571 *Wolbachia*-) and phalloidin -yellow or grey- decorating the actin cytoskeleton. Lower panels  
572 are enlargements of areas marked in green. White boxes highlight the nuclear organization  
573 around the rachis. Green arrows point to a branched rachis. Green arrowheads encompass the  
574 rachis.

575

576 **Figure 7 Contribution of *Wolbachia* to the *B. malayi* oogenesis and phenotypes resulting**  
577 **from the endosymbionts depletion.**

578 Cartoons on the left are schematic representations of full length ovaries connected to distal  
579 uteri. They depict the early embryonic development, altered in absence of *Wolbachia* (i.e.  
580 apoptosis in grey). The green rectangles highlight the distal ovaries represented on the right.

581

582 **STAR METHODS**

583

584 **Contact for Reagent and Resource Sharing**

585 Further information and requests for resources and reagents should be directed to and will be  
586 fulfilled by the Lead Contact, Frédéric Landmann ([frederic.landmann@crbm.cnrs.fr](mailto:frederic.landmann@crbm.cnrs.fr))

587

588 **Experimental Model and Subject Details**

589 **Ethics statement**

590 All experiments involving animals were approved by the ethical review committee of  
591 the Ministère de l'Éducation Nationale, de l'Enseignement Supérieur et de la Recherche  
592 (authorization #03622.01). Housing, breeding and animal care were carried out in strict  
593 accordance with the EU Directive 2010/63/UE.

594

595 **Parasite material**

596 Living *B. malayi* worms, harvested from infected jirds (*Meriones unguiculatus*), were  
597 supplied by the NIAID/NIH Filariasis Research Reagent Resource Center (FR3, Athens,  
598 USA) via the Biodefense and Emerging Infections Research Resources Repository (BEI  
599 Resources, Manassas, USA) or produced at the Institut de Recherche pour le Développement  
600 (IRD, Montpellier, France). Jirds were infected by injection in the peritoneal cavity of 100-  
601 200 infective larvae (L3s) freshly collected from *Aedes aegypti* Strain Black Eye Liverpool,  
602 following the FR3 protocols (<http://www.filariasiscenter.org/protocols/Protocols>). Living  
603 *Acanthocheilonema viteae* worms, harvested from infected Golden Syrian LVG Hamsters  
604 (*Mesocricetus auratus*), were supplied by the NIAID/NIH Filariasis Research Reagent  
605 Resource Center (FR3, Oshkosh, USA). To obtain *Wolbachia*-depleted *B. malayi*, jirds  
606 received tetracycline at 2.5 mg/mL in drinking water 90 days post-infection (dpi) during a  
607 period of 6 weeks, or tetracycline at 50 mg/kg/day during two weeks *per os* using a solution at  
608 10 mg/mL. Worms were collected from the peritoneal cavity two weeks after the end of the  
609 antibiotic treatment, and the *Wolbachia* clearance in the soma and germline confirmed by

610 fluorescent microscopy. Wild-type counterparts were obtained from jirds maintained for the  
611 same duration without the tetracycline regimen. For *in vitro* live assays, living worms were  
612 placed in culture medium (80% RPMI-1640, 10% decompemented FBS, 10% MEM, 1%  
613 glucose, 25 mM HEPES buffer, pH 7.4), in incubation at 37°C and 5% CO<sub>2</sub>. Typically, 0.5 or  
614 1 mL/worm/day of culture medium were used for adult male and *female B. malayi*  
615 respectively, in 6 or 24-well culture plate (Greiner Bio-One), and the culture medium was  
616 changed every 48 hours. At the end of experiments, worms were flash frozen in liquid  
617 nitrogen and kept at -80°C until dissection.

618

## 619 **Method Details**

### 620 **Tissues collection**

621 Frozen worms were thawed at room temperature and fixed in a 3,2% paraformaldehyde  
622 (Electron Microscopy Sciences, #15714) PBS solution during either 10 or 15 minutes on a  
623 rocker for males and females respectively, then washed 3 times in PBST (1x PBS, Tween-20  
624 0,2%). Dissections were performed in PBST under binocular microscope (SMZ1270; Nikon)  
625 with dissection tweezers. To collect ovaries, a first incision was performed in the posterior  
626 part, close to the distal uteri, by gently tearing apart the body walls, without breaking the  
627 gonads and intestine. A second cut at the very end of the tail prevents internal pressure when  
628 pulling on the posterior body fragment. Both ovaries were then carefully pulled out of the  
629 body cavity. The same procedure was applied to collect the testis except that the first incision  
630 was performed at the half of the body and the second at the tip of the head since the distal part  
631 of the testis lies at the level of the pharynx.

632

### 633 **Stainings**

634 For immunostaining, dissected gonads were collected in 0.5 mL eppendorf tubes with  
635 PBST, and permeabilized with the following protocol empirically established: after a 45  
636 minute incubation with a 3% hydrogen peroxide solution, gonads were washed three times in  
637 PBST, treated for 30 minutes with a (1:1) mix of heptane and NP40 2% in PBS, and then  
638 washed 3 times in PBST. All these steps were performed on a rocker at room temperature.  
639 Gonads were incubated overnight at 4°C with a primary antibody, washed 3 times in PBST  
640 and incubated overnight at 4°C or alternatively for 6h at room temperature with a secondary  
641 antibody, washed 3 times in PBST. Mitotic nuclei were revealed with an anti-phospho-histone  
642 3 pSer 10 (PH3), rabbit monoclonal antibody (Invitrogen, # 701258, 1:250). Because tri-  
643 methylation on lysine 27 of histone 3 is enriched on X-chromosome in *C. elegans* during

644 spermatogenesis (Schaner and Kelly, 2006), an anti-H3K27me3 rabbit polyclonal (Epigentek  
645 A-4039, 1:250), was used to monitor the correct chromosome segregation in male *B.*  
646 *malayi*. We used a goat anti-rabbit IgG secondary Cy3 conjugated antibody, (Invitrogen,  
647 #A10520, 1:250). Actin staining was performed using Phalloidin Rhodamine 110 conjugate  
648 (Biotium, 1:100), added together with the secondary antibody. As previously described  
649 (Landmann et al., 2010, 2014), *Wolbachia* were specifically stained with a short incubation in  
650 propidium iodide (Invitrogen, #P3566, 10 µg/mL in PBS) after treatment with RNase A  
651 (Sigma-Aldrich, #R6513, 10 mg/mL in PBS) overnight at 4°C. Samples were mounted in  
652 Fluoroshield Mounting Medium with DAPI (Abcam, #Ab104139).

653

### 654 **Edu assays**

655 For *in vitro* analyses, living adult worms were placed in culture medium preheated at  
656 37°C supplemented with 200 µM 5-ethynyl-2'-deoxyuridine (EdU, Invitrogen, #A10044),  
657 using a stock solution at 10 mM in DMSO. After *ad hoc* incubation times, worms were flash  
658 frozen. EdU was revealed after fixation, dissection and permeabilization steps using the  
659 Click-It EdU Alexa Fluor 488 Imaging Kit (Invitrogen, #C10337) following the  
660 manufacturer's instructions, except that reactions were performed in 0.5 ml tubes.

661 For *in vivo* assays, infected jirds received one intra-peritoneal injection of EdU per day  
662 during three consecutive days. EdU was given at a dose of 50 mg/kg body weight in a  
663 solution of 10mg/ml PBS (Chehrehasa et al., 2009) and the first injection was performed after  
664 90 days post infection. Worms were collected from the peritoneal cavity 24 hrs after the last  
665 injection and immediately flash frozen. EdU Click-It reactions were performed as described  
666 above. When EdU analyses were combined with immunostainings, the EdU Click-It steps  
667 were performed before the incubation with the primary and secondary antibodies.

668

### 669 **Colchicine assays**

670 Living adult worms were placed in preheated culture medium at 37°C supplemented  
671 with 1mM colchicine (Sigma-Aldrich, #C9754) using a stock solution at 100 mM in ethanol.  
672 Worms were incubated 4 hrs at 37°C and were then flash frozen. No effect of ethanol on the  
673 mitotic proliferation was observed in control experiments (data not shown).

674

### 675 **Gamma-secretase inhibitor**

676 A 10 mM stock of Dibenzazepine (DBZ, Stemcell Technologies, #73092) in DMSO  
677 was diluted in preheated culture medium at 37°C. Based on previous studies using DBZ

678 (Ichida et al., 2014) or an other gamma-secretase inhibitor (Geling et al., 2002), DBZ has  
679 been tested at 10 and 100  $\mu$ M. Control worms were mock-treated with medium containing the  
680 same concentration of DMSO carrier only.

681

## 682 **Laser ablation**

683 Living adult worms were individually immobilized in preheated culture medium at  
684 37°C supplemented with 1 mM levamisol (Sigma-Aldrich, #31742) during few seconds and  
685 mounted on an agar pad (0.6% in PBS) under a coverslip. Before imaging, the slide was  
686 maintained on ice to maintain the anaesthesia. The laser microsurgery was performed using an  
687 Ultra II Coherent multiphoton laser at 800 nm full power coupled to a Zeiss LSM780  
688 confocal microscope. The sample was imaged in transmission mode using the 561nm laser  
689 and the 63X 1.4NA oil immersion objective. The ablation to kill the cell was obtained with 1  
690 to 10 iterations in a region of 10\*10  $\mu$ m. The distal tip cell (DTC) was ablated from one ovary  
691 per worm and the remaining ovary was kept intact as an internal negative control. When the  
692 targeted cell appeared to be destroyed, the worm was returned to *in vitro* culture maintained  
693 during 24 hrs before analysis. During all the subsequent steps, ovaries from the same female  
694 were processed together, and the pair information was taken in account in statistical analyses.

695

## 696 **Microscopy and Image analyses**

697 Confocal microscope images were captured with an inverted laser scanning confocal  
698 microscope (SP5-SMD; Leica Microsystems) using a 63X/1.4 HCX PL APO CS oil objective  
699 and a resonant scanner (8000Hz). Gonads were fully imaged with a z-stack interval of 0.5 $\mu$ m  
700 and identical imaging conditions. The digital images were processed and analyzed using a  
701 custom macro with the ImageJ 1.48v software (<http://imagej.nih.gov/ij/>) to semi-  
702 automatically quantify the number and the distribution of cells *i*) in the proliferative zone, *ii*)  
703 in mitosis and *iii*) in S-phase. Briefly, the gonad was first digitally linearized with a  
704 straightening function and then analyzed per 50 $\mu$ m-wide sections starting from the distal tip  
705 cell. For each section, we estimated *i*) the total number of nuclei, by multiplying the sum of  
706 DAPI area from one median z-stack by the number of nuclei rows in the z-axis; *ii*) the number  
707 of mitotic and S-phase cells by summing the PH3 and EdU areas respectively, in the z-  
708 projection of all planes. To reduce the background noise, a size particle selection filter was  
709 manually applied before area summation to remove particles with an area three-time smaller  
710 or larger than the mean nucleus area. The accuracy of this procedure was compared to manual  
711 counts on few gonads and all data obtained with this procedure were manually curated.

712

### 713 **Expression of candidate genes**

714 Ovaries used for RNA extractions were dissected from living adult females. Dissections  
715 were performed under a binocular microscope as described above, in a RNase-free  
716 environment by placing the worms in sterile PBS 1X and cleaning all the materials with  
717 RNaseZap (Invitrogen, #AM9780). Five pairs of ovaries were pooled per biological replicate  
718 in a frozen tube maintained on dry ice. Tubes were flash frozen and stored at -80°C until  
719 RNA extraction. Extractions were performed using the Quick RNA MicroPrep kit (Zymo-  
720 Research, #R1050) and residual contaminant DNA was removed with Turbo DNase  
721 (Invitrogen, #AM1907), followed by purification using the RNA Clean & Concentrator 5  
722 (Zymo-Research, #R1016). The RNA yields were determined fluorometrically using Qubit  
723 2.0 (Life Technologies). The cDNA was synthesized using the SuperScript® VILO cDNA  
724 Synthesis Kit (Invitrogen, #11754050), according to manufacturer's instructions.

725 Orthologs of *C. elegans* genes involved in mitotic proliferation and cell cycle were  
726 identified in *B. malayi* genome (Bmal-4.0, Ghedin *et al.* 2007) using BLASTP and the open-  
727 access WormBase ParaSite website (Harris *et al.*, 2009). Primer pairs were designed  
728 according to Primer3 version 0.4.0 (Untergasser *et al.*, 2012) such as the forward and reverse  
729 primers were hybridized in two different exons to avoid background genomic DNA  
730 contamination (see Table S1 for details). All primers were commercially synthesized by  
731 Eurofins Genomics and their efficiency was close to 100%. Primers were diluted to a final  
732 concentration of 200 nM in the master mix. Amplifications were performed using the Brilliant  
733 III Ultra-Fast SYBR Green QPCR Master Mix (Agilent Technologies, #600882), Mx3000P  
734 instrument (Agilent Technologies), and MxPro QPCR Software (Agilent Technologies) using  
735 the option SYBR Green (with Dissociation Curve) according to manufacturer's instructions.  
736 The PCR cycling program consists of a pre-amplification cycle of 3 minutes at 95°C followed  
737 by 40 amplification cycles of 20 seconds at 95°C then, 20 seconds at 60°C and a  
738 dissociation/melt cycle of 1 minute at 95°C followed by 30 seconds at 60°C and 30 seconds at  
739 95°C. For each primer pairs, quantitative measurements were carried out in triplicate on three  
740 independent biological replicates. Among the two reference genes tested (Table S1), Bma-  
741 Anc-1 gene was the best one identified with NormFinder tool (Andersen *et al.*, 2004) and was  
742 used to normalize gene expression.

743

### 744 **Nucleotide quantification**

745 Flash-frozen *B. malayi* and *A. vitae* females in liquid nitrogen were used to crush ~20 mg of  
746 worms per replicate (corresponding to 15 *B. malayi* females and 4 *A. viteae* females) on dry  
747 ice followed by an extraction with 2\*1mL of methanol/water (80/20 v/v) at -40°C containing  
748 240 µL of fully <sup>13</sup>C-labeled cellular extract IDMS (used as internal standard). After  
749 centrifugation (5 min, 10000g, 4°C), the supernatants were recovered and evaporated to  
750 remove the solvents. Samples in triplicates were suspended in 240 µL of ultra-pure water  
751 prior to the mass spectrometry analysis. Samples were analyzed at the MetaToul facility  
752 (Metabolomics & Fluxomics Facilities, Toulouse, France) by ion chromatography (ICS  
753 5000+ system, Dionex, Sunnyvale, CA, USA) coupled with a 4000 QTrap triple quadrupole  
754 mass spectrometer (ABSciex, Framingham, MA, USA) equipped with a Turbo V source  
755 (ABSciex) for electrospray ionization (Kiefer et al., 2007). Intracellular metabolites were  
756 analyzed in the multiple reaction monitoring (MRM) mode, and the isotope dilution mass  
757 spectrometry (IDMS) method (Wu et al., 2005) was used to ensure accurate quantification.  
758 Fragmentation was done by collision-activated dissociation using nitrogen as the collision gas  
759 at medium pressure.

760

#### 761 **Quantification and Statistical Analysis**

762 All statistical analyses and graphics were carried out using R 3.1.3 (R Development Core  
763 Team 2010). Non-parametric Wilcoxon rank-sum tests were used for two samples  
764 comparisons, except for the relative gene expressions that were analysed with Student's t-  
765 tests. Exact p-values and sample sizes are indicated in the corresponding figures.

766

767

768

#### 769 **SUPPLEMENTAL ITEM TITLES AND LEGENDS**

770

##### 771 **Supplemental Table 1**

##### 772 **List of genes and primers used for qRT-PCR**

773

##### 774 **Supplemental Figure 1**

##### 775 **The tetracycline treatment efficiently eliminates *Wolbachia*.**

776 Distal parts of ovaries dissected from wild-type and *Wolbachia*-depleted females, stained with  
777 DAPI -cyan- and propidium iodide -red-. The latter stains preferentially the *Wolbachia* DNA  
778 while the DAPI reveals the host DNA (i.e. in the wild-type ovary). The combination of these

779 DNA dyes allows an easy look at the localization and the presence of the symbionts. Distal  
780 part to the left, the yellow arrows point to the DTCs. Scale bar = 5  $\mu$ m.

781

## 782 **Supplemental Figure 2**

### 783 **Characterization of the *Brugia malayi* spermatogenesis in wild-type and *Wb(-)* males.**

784 Confocal images of (A) A dissected testis stained with DAPI. The yellow arrow points to the  
785 DTC, and the distal part is attached to the pharynx -green dotted lines-. (B) A distal part of a  
786 testis from a male incubated in EdU for 8 hrs corresponding to the area highlighted by green  
787 box in (A), and stained respectively with DAPI, an anti-phosphorylated histone H3 -PH3-  
788 antibody, EdU and followed by a merge of the Edu -yellow- and PH3 -magenta- channels. (C)  
789 Proliferative zones of linearized testes from wild-type and *Wolbachia*-depleted males, stained  
790 with DAPI and an anti-PH3 after an EdU incubation. Scale bars = 50  $\mu$ m. (D) Left panels:  
791 Products of the second meiotic division from wild-type and *Wolbachia*-depleted males show  
792 proper segregation patterns. The actin (green) highlights the connecting residual body. Right  
793 panels: a DAPI stain on mature spermatocytes from wild-type (top) and *Wolbachia*-depleted  
794 (bottom) reveals the five, aligned chromosomes. Scale bars = 1  $\mu$ m.

795

## 796 **Supplemental Figure 3**

### 797 **Scoring of apoptotic nuclei in the proliferative zone and apoptotic indexes.**

798 (A) Segment of a female proliferative zone stained with DAPI -red- and an anti phospho  
799 histone 3 -green-. The small round, DAPI-bright and PH3-negative nuclei are apoptotic -  
800 yellow arrows-. (B) Apoptotic indexes in the PZ of ovaries from *B. malayi* females collected  
801 from untreated or tetracycline-treated gerbil hosts. Antibiotic treatments were administered  
802 *per os* for 4 days.

803

## 804 **Supplemental Figure 4**

### 805 **Heat maps of mitotic nuclei and nuclear densities distributions along ovarian 806 proliferative zones from wild-type and *Wolbachia*-depleted *B.malayi* females.**

807 Distribution of (A) mitotic nuclei and (B) total nuclear counts along female PZ, per segments  
808 of 50  $\mu$ m starting from the distal tip of the ovaries. Each line represents the analysis of one  
809 ovary. For wild-type ovaries n= 21, and n= 29 for *Wolbachia*-depleted conditions.

810

## 811 **Supplemental Figure 5**

### 812 **Laser ablation of the Distal Tip Cell does not prevent germline proliferation.**



813 (A) Impact of the laser ablation on the DTC in living worms. Bright field acquisitions during  
814 the experiment: 1 Before ablation, the DTC is clearly visible at the tip of the ovary -yellow  
815 inset-. 2 The localized laser impact heats up the cell and creates a transient air bubble -black  
816 in the image-. 3 Few seconds later the DTC appears destroyed. (B) Confocal images of a pair  
817 of ovaries from a wild-type female, DTC-ablated and spared, stained with an anti-PH3 -  
818 magenta- and DAPI -grey- 24 hrs post-ablation. (C) Quantification of PH3+ nuclei in both  
819 types of ovaries. (D) A Phalloidin stain -grey- reveals the actin and confirms the absence of  
820 DTC 24hrs after laser ablation -DAPI in blue, propidium iodide in magenta-.

821

## 822 **Supplemental Figure 6**

### 823 **Quantitative PCRs on *B. malayi* orthologs of cell cycle regulators controlling the** 824 **germline proliferation in *C. elegans*.**

825 The fold change was normalized using *Bma anc-1* to measure expression levels for *Bma*  
826 *cycline E*, *cdk2* and *cdc25*.

827

## 828 **Supplemental Figure 7**

### 829 **Germline stem cells loose their quiescence upon *Wolbachia* removal.**

830 (A) Quantification of PH3+ nuclei in the 1st 150  $\mu\text{m}$  of spared control and DTC-ablated  
831 ovaries, 20 hrs post-ablation and after a 4 hr treatment with colchicine 1mM. (B) Distal  
832 ovaries from wild-type and *Wb(-)* worms collected after 72 hrs of *in vivo* EdU treatment in  
833 gerbils, EdU in cyan, DAPI in grey. (C) Number of EdU-positive nuclei counted in the most  
834 distal 0 to 50  $\mu\text{m}$  and 0 to 150  $\mu\text{m}$ -long segments of ovaries from wild-type and *Wolbachia*-  
835 depleted females.

836

837

## 838 **REFERENCES**

839

840 Andersen, C., Jensen, J., and Orntoft, T. (2004). Normalization of Real - Time Quantitative  
841 Reverse Transcription - PCR Data : A Model - Based Variance Estimation Approach to  
842 Identify Genes Suited for Normalization , Applied to Bladder and Colon Cancer Data Sets.  
843 *Cancer Res.* 64, 5245.

844 Austin, J., and Kimble, J. (1987). *glp-1* Is required in the germ line for regulation of the  
845 decision between mitosis and meiosis in *C. elegans*. *Cell* 51, 589–599.

846 Baldo, L., Hotopp, J.C.D., Jolley, K.A., Bordenstein, S.R., Biber, S.A., Choudhury, R.R.,

847 Hayashi, C., Maiden, M.C.J., Tettelin, H., and Werren, J.H. (2006). Multilocus sequence  
848 typing system for the endosymbiont *Wolbachia pipientis*. *Appl. Environ. Microbiol.* *72*,  
849 7098–7110.

850 Beckmann, J., Ronau, J., and Hochstrasser, M. (2017). A *wolbachia* deubiquitylating enzyme  
851 induces cytoplasmic incompatibility. *Nat. Microbiol.* *2*.

852 Bester, A.C., Roniger, M., Oren, Y.S., Im, M.M., Sarni, D., Chaoat, M., Bensimon, A., Zamir,  
853 G., Shewach, D.S., and Kerem, B. (2011). Nucleotide deficiency promotes genomic  
854 instability in early stages of cancer development. *Cell* *145*, 435–446.

855 Bierne, H., Hamon, M., and Cossart, P. (2012). Epigenetics and bacterial infections. *Cold*  
856 *Spring Harb. Perspect. Med.* *2*.

857 Blaxter, M.L., De Ley, P., Garey, J.R., Liu, L.X., Scheldeman, P., Vierstraete, A.,  
858 Vanfleteren, J.R., Mackey, L.Y., Dorris, M., Frisse, L.M., et al. (1998). A molecular  
859 evolutionary framework for the phylum Nematoda. *Nature* *392*, 71–75.

860 Byrd, D.T., Knobel, K., Affeldt, K., Crittenden, S.L., and Kimble, J. (2014). A DTC niche  
861 plexus surrounds the germline stem cell pool in *Caenorhabditis elegans*. *PLoS One* *9*.

862 Chehrehasa, F., Meedeniya, A.C.B., Dwyer, P., Abrahamsen, G., and Mackay-Sim, A. (2009).  
863 EdU, a new thymidine analogue for labelling proliferating cells in the nervous system. *J.*  
864 *Neurosci. Methods* *177*, 122–130.

865 Chi, C., Ronai, D., Than, M.T., Walker, C.J., Sewell, A.K., and Han, M. (2016). Nucleotide  
866 levels regulate germline proliferation through modulating GLP-1/Notch signaling in *C.*  
867 *elegans*. *Genes Dev.* *30*, 307–320.

868 Crittenden, S.L., Troemel, E.R., Evans, T.C., and Kimble, J. (1994). GLP-1 is localized to the  
869 mitotic region of the *C. elegans* germ line. *Development* *120*, 2901–2911.

870 Crittenden, S.L., Bernstein, D.S., Bachorik, J.L., Thompson, B.E., Gallegos, M., Petcherski,  
871 A.G., Moulder, G., Barstead, R., Wickens, M., and Kimble, J. (2002). A conserved RNA-  
872 binding protein controls germline stem cells in *Caenorhabditis elegans*. *Nature* *417*, 660–663.

873 Crittenden, S.L., Leonhard, K., Byrd, D.T., and Kimble, J. (2006). Cellular Analyses of the  
874 Mitotic Region in the *Caenorhabditis elegans* Adult Germ Line. *Mol. Biol. Cell* *17*, 3051–  
875 3061.

876 Dedeine, F., Vavre, F., Fleury, F., Loppin, B., Hochberg, M.E., and Boulétreau, M. (2001).  
877 Removing symbiotic *Wolbachia* bacteria specifically inhibits oogenesis in a parasitic wasp.  
878 *Proc. Natl. Acad. Sci. U. S. A.* *98*, 6247–6252.

879 Desjardins, C.A., Cerqueira, G.C., Goldberg, J.M., Dunning Hotopp, J.C., Haas, B.J., Zucker,  
880 J., Ribeiro, J.M.C., Saif, S., Levin, J.Z., Fan, L., et al. (2013). Genomics of *Loa loa*, a

881 Wolbachia-free filarial parasite of humans. *Nat. Genet.* *45*, 495–500.

882 Fast, E.M., Toomey, M.E., Panaram, K., Desjardins, D., Kolaczyk, E.D., and Frydman, H.M.  
883 (2011). Wolbachia enhance *Drosophila* stem cell proliferation and target the germline stem  
884 cell niche. *Science* *334*, 990–992.

885 Fenn, K., and Blaxter, M. (2007). Coexist, cooperate and thrive: Wolbachia as long-term  
886 symbionts of filarial nematodes. *Issues Infect. Dis.* *5*, 66–76.

887 Ferree, P.M., Frydman, H.M., Li, J.M., Cao, J., Wieschaus, E., and Sullivan, W. (2005).  
888 Wolbachia utilizes host microtubules and Dynein for anterior localization in the *Drosophila*  
889 Oocyte. *PLoS Pathog.* *1*, 0111–0124.

890 Ferri, E., Bain, O., Barbuto, M., Martin, C., Lo, N., Uni, S., Landmann, F., Baccei, S.G.,  
891 Guerrero, R., de Souza Lima, S., et al. (2011). New insights into the evolution of Wolbachia  
892 infections in filarial nematodes inferred from a large range of screened species. *PLoS One* *6*.  
893 Fischer, K., Beatty, W.L., Jiang, D., Weil, G.J., and Fischer, P.U. (2011). Tissue and stage-  
894 specific distribution of Wolbachia in *Brugia malayi*. *PLoS Negl. Trop. Dis.* *5*.

895 Foster, J., Ganatra, M., Kamal, I., Ware, J., Makarova, K., Ivanova, N., Bhattacharyya, A.,  
896 Kapatral, V., Kumar, S., Posfai, J., et al. (2005). The Wolbachia genome of *Brugia malayi*:  
897 endosymbiont evolution within a human pathogenic nematode. *PLoS Biol.* *3*, e121.

898 Fox, P.M., Vought, V.E., Hanazawa, M., Lee, M.-H., Maine, E.M., and Schedl, T. (2011).  
899 Cyclin E and CDK-2 regulate proliferative cell fate and cell cycle progression in the *C.*  
900 *elegans* germline. *Development* *138*, 2223–2234.

901 Fuwa, H., Takahashi, Y., Konno, Y., Watanabe, N., Miyashita, H., Sasaki, M., Natsugari, H.,  
902 Kan, T., Fukuyama, T., Tomita, T., et al. (2007). Divergent Synthesis of Multifunctional  
903 Molecular Probes To Elucidate the Enzyme Specificity of Dipeptidic  $\gamma$ -Secretase Inhibitors.  
904 *ACS Chem. Biol.* *2*, 408–418.

905 Geling, A., Steiner, H., Willem, M., Bally-Cuif, L., Haass, C., Berezovska, O., Xia, M.Q.,  
906 Hyman, B.T., Berezovska, O., Blader, P., et al. (2002). A gamma-secretase inhibitor blocks  
907 Notch signaling in vivo and causes a severe neurogenic phenotype in zebrafish. *EMBO Rep.*  
908 *3*, 688–694.

909 Geoghegan, V., Stainton, K., Rainey, S.M., Ant, T.H., Dowle, A.A., Larson, T., Hester, S.,  
910 Charles, P.D., Thomas, B., and Sinkins, S.P. (2017). Perturbed cholesterol and vesicular  
911 trafficking associated with dengue blocking in Wolbachia-infected *Aedes aegypti* cells. *Nat.*  
912 *Commun.* *8*, 526.

913 Ghedin, E., Wang, S., Spiro, D., Caler, E., Zhao, Q., Crabtree, J., Allen, J.E., Delcher, A.L.,  
914 Guiliano, D.B., Miranda-Saavedra, D., et al. (2007). Draft genome of the filarial nematode

- 915 parasite *Brugia malayi*. *Science* *317*, 1756–1760.
- 916 Hansen, D., and Schedl, T. (2013). Germ Cell Development in *C. elegans*. *757*, 1–26.
- 917 Harris, T.W., Antoshechkin, I., Bieri, T., Blasiar, D., Chan, J., Chen, W.J., De la Cruz, N.,  
918 Davis, P., Duesbury, M., Fang, R., et al. (2009). Wormbase: A comprehensive resource for  
919 nematode research. *Nucleic Acids Res.* *38*, 463–467.
- 920 Hoerauf, A., Nissen-Pähle, K., Schmetz, C., Henkle-Dührsen, K., Blaxter, M.L., Büttner,  
921 D.W., Gallin, M.Y., Al-Qaoud, K.M., Lucius, R., and Fleischer, B. (1999). Tetracycline  
922 therapy targets intracellular bacteria in the filarial nematode *Litomosoides sigmodontis* and  
923 results in filarial infertility. *J. Clin. Invest.* *103*, 11–18.
- 924 Hurst, G.D.D. (2017). Extended genomes: symbiosis and evolution. *Interface Focus* *7*,  
925 20170001.
- 926 Ichida, J.K., Tcw, J., Williams, L.A., Carter, A.C., Shi, Y., Moura, M.T., Ziller, M., Singh, S.,  
927 Amabile, G., Umezawa, A., et al. (2014). Notch inhibition allows oncogene independent  
928 generation of iPS cells. *Nat. Chem. Biol.* *10*, 632–639.
- 929 Kamtchum-Tatuene, J., Makepeace, B.L., Benjamin, L., Baylis, M., and Solomon, T. (2016).  
930 The potential role of *Wolbachia* in controlling the transmission of emerging human arboviral  
931 infections. *Curr. Opin. Infect. Dis.* *30*, 1.
- 932 Kiefer, P., Nicolas, C., Letisse, F., and Portais, J.C. (2007). Determination of carbon labeling  
933 distribution of intracellular metabolites from single fragment ions by ion chromatography  
934 tandem mass spectrometry. *Anal. Biochem.* *360*, 182–188.
- 935 Killian, D.J., and Hubbard, E.J.A. (2005). *Caenorhabditis elegans* germline patterning  
936 requires coordinated development of the somatic gonadal sheath and the germ line. *Dev. Biol.*  
937 *279*, 322–335.
- 938 Kimble, J. (2005). Germline proliferation and its control. *WormBook*.
- 939 Kimble, J., and White, J. (1981). On the control of germ cell development in *Caenorhabditis*  
940 *elegans*. 208–219.
- 941 Kozek, W.J. (1977). Transovarially-transmitted intracellular microorganisms in adult and  
942 larval stages of *Brugia malayi*. *J. Parasitol.* *63*, 992–1000.
- 943 Lamont, L.B., Crittenden, S.L., Bernstein, D., Wickens, M., and Kimble, J. (2004). FBF-1 and  
944 FBF-2 regulate the size of the mitotic region in the *C. elegans* germline. *Dev. Cell* *7*, 697–  
945 707.
- 946 Landmann, F., Foster, J., Slatko, B., and Sullivan, W. (2010). Asymmetric *wolbachia*  
947 segregation during Early *Brugia malayi* embryogenesis determines its distribution in adult  
948 host tissues. *PLoS Negl. Trop. Dis.* *4*.

- 949 Landmann, F., Voronin, D., Sullivan, W., and Taylor, M.J. (2011). Anti-filarial activity of  
950 antibiotic therapy is due to extensive apoptosis after Wolbachia depletion from filarial  
951 nematodes. *PLoS Pathog.* 7, e1002351.
- 952 Landmann, F., Bain, O., Martin, C., Uni, S., Taylor, M.J., and Sullivan, W. (2012). Both  
953 asymmetric mitotic segregation and cell-to-cell invasion are required for stable germline  
954 transmission of Wolbachia in filarial nematodes. *Biol. Open* 1, 536–547.
- 955 Landmann, F., Foster, J., Michalski, M.L., Slatko, B.E., and Sullivan, W. (2014). Co-  
956 evolution between an endosymbiont and its nematode host: Wolbachia asymmetric posterior  
957 localization and AP polarity establishment. *PLoS Negl. Trop. Dis.* 8, e3096.
- 958 Lee, C., Sorensen, E.B., Lynch, T.R., and Kimble, J. (2016). *C. elegans* GLP-1/Notch  
959 activates transcription in a probability gradient across the germline stem cell pool. *Elife* 5, 1–  
960 23.
- 961 Lepage, D.P., Metcalf, J.A., Bordenstein, S.R., On, J., Perlmutter, J.I., Shropshire, J.D.,  
962 Layton, E.M., Funkhouser-Jones, L.J., Beckmann, J.F., and Bordenstein, S.R. (2017).  
963 Prophage WO genes recapitulate and enhance Wolbachia-induced cytoplasmic  
964 incompatibility. *Nat. Publ. Gr.*
- 965 Li, Z., and Carlow, C.K.S. (2012). Characterization of Transcription Factors That Regulate  
966 the Type IV Secretion System and Riboflavin Biosynthesis in Wolbachia of *Brugia malayi*.  
967 *PLoS One* 7.
- 968 Mathews, C.K. (2015). Deoxyribonucleotide metabolism, mutagenesis and cancer. *Nat. Rev.*  
969 *Cancer* 15, 528–539.
- 970 McCall, J.W., Genchi, C., Kramer, L.H., Guerrero, J., and Venco, L. (2008). Chapter 4  
971 Heartworm Disease in Animals and Humans. *Adv. Parasitol.* 66, 193–285.
- 972 McCarter, J., Bartlett, B., Dang, T., and Schedl, T. (1997). Soma–germ cell interactions in  
973 *Caenorhabditis elegans*: multiple events of hermaphrodite germline development require the  
974 somatic sheath and spermathecal lineages. *Dev. Biol.* 181, 121–143.
- 975 McFall-Ngai, M.J. (2014). The Importance of Microbes in Animal Development: Lessons  
976 from the Squid-Vibrio Symbiosis. *Annu. Rev. Microbiol.* 68, 177–194.
- 977 McFall-Ngai, M.J. (2015). Giving microbes their due - animal life in a microbially dominant  
978 world. *J. Exp. Biol.* 218, 1968–1973.
- 979 McFall-Ngai, M., Hadfield, M.G., Bosch, T.C.G., Carey, H. V, Domazet-Lošo, T., Douglas,  
980 A.E., Dubilier, N., Eberl, G., Fukami, T., Gilbert, S.F., et al. (2013). Animals in a bacterial  
981 world, a new imperative for the life sciences. *Proc. Natl. Acad. Sci. U. S. A.*
- 982 Ote, M., Ueyama, M., and Yamamoto, D. (2016). Wolbachia Protein TomO Targets nanos

983 mRNA and Restores Germ Stem Cells in *Drosophila* Sex-lethal Mutants. *Curr. Biol.* *26*, 1–10.  
984 Schaner, C.E., and Kelly, W.G. (2006). Germline chromatin. In *WormBook : The Online*  
985 *Review of C. Elegans Biology*, pp. 1–14.  
986 Seidel, H.S., and Kimble, J. (2015). Cell-cycle quiescence maintains *Caenorhabditis elegans*  
987 germline stem cells independent of GLP-1/Notch. *Elife* *4*, 1–28.  
988 Slatko, B.E., Taylor, M.J., and Foster, J.M. (2010). The *Wolbachia* endosymbiont as an anti-  
989 filarial nematode target. *Symbiosis* *51*, 55–65.  
990 Slatko, B.E., Luck, A.N., Dobson, S.L., and Foster, J.M. (2014). *Wolbachia* endosymbionts  
991 and human disease control. *Mol. Biochem. Parasitol.* *195*, 88–95.  
992 Starr, D.J., and Cline, T.W. (2002). A host–parasite interaction rescues *Drosophila* oogenesis  
993 defects. *Nature* *418*, 76–79.  
994 Taylor, M.J., Hoerauf, A., and Bockarie, M. (2010). Lymphatic filariasis and onchocerciasis.  
995 *Lancet* *376*, 1175–1185.  
996 Untergasser, A., Cutcutache, I., Koressaar, T., Ye, J., Faircloth, B.C., Remm, M., and Rozen,  
997 S.G. (2012). Primer3-new capabilities and interfaces. *Nucleic Acids Res.* *40*, 1–12.  
998 Werren, J.H., Baldo, L., and Clark, M.E. (2008). *Wolbachia*: master manipulators of  
999 invertebrate biology. *Nat. Rev Microbiol* *6*, 741–751.  
1000 Wong, M.-C., and Schwarzbauer, J.E. (2012). Gonad morphogenesis and distal tip cell  
1001 migration in the *Caenorhabditis elegans* hermaphrodite. *Wiley Interdiscip. Rev. Dev. Biol.* *1*,  
1002 519–531.  
1003 Wu, L., Mashego, M.R., Van Dam, J.C., Proell, A.M., Vinke, J.L., Ras, C., Van Winden,  
1004 W.A., Van Gulik, W.M., and Heijnen, J.J. (2005). Quantitative analysis of the microbial  
1005 metabolome by isotope dilution mass spectrometry using uniformly <sup>13</sup>C-labeled cell extracts  
1006 as internal standards. *Anal. Biochem.* *336*, 164–171.  
1007 Zug, R., and Hammerstein, P. (2014). Bad guys turned nice? A critical assessment of  
1008 *Wolbachia* mutualisms in arthropod hosts. *Biol. Rev.* *90*, 89–111.  
1009

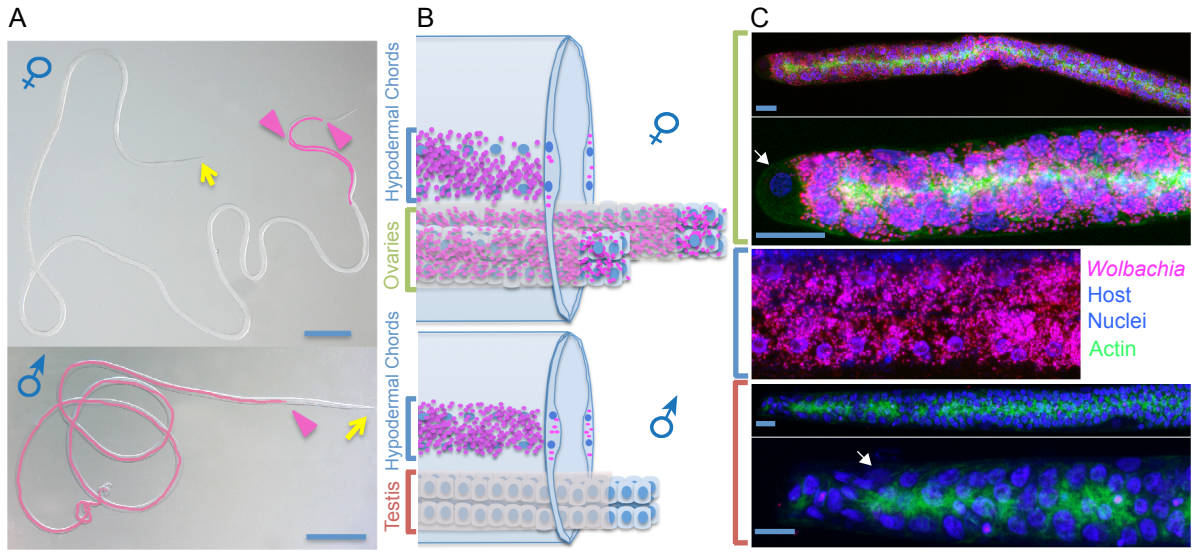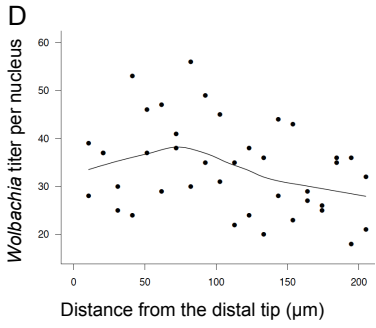

FIGURE 1

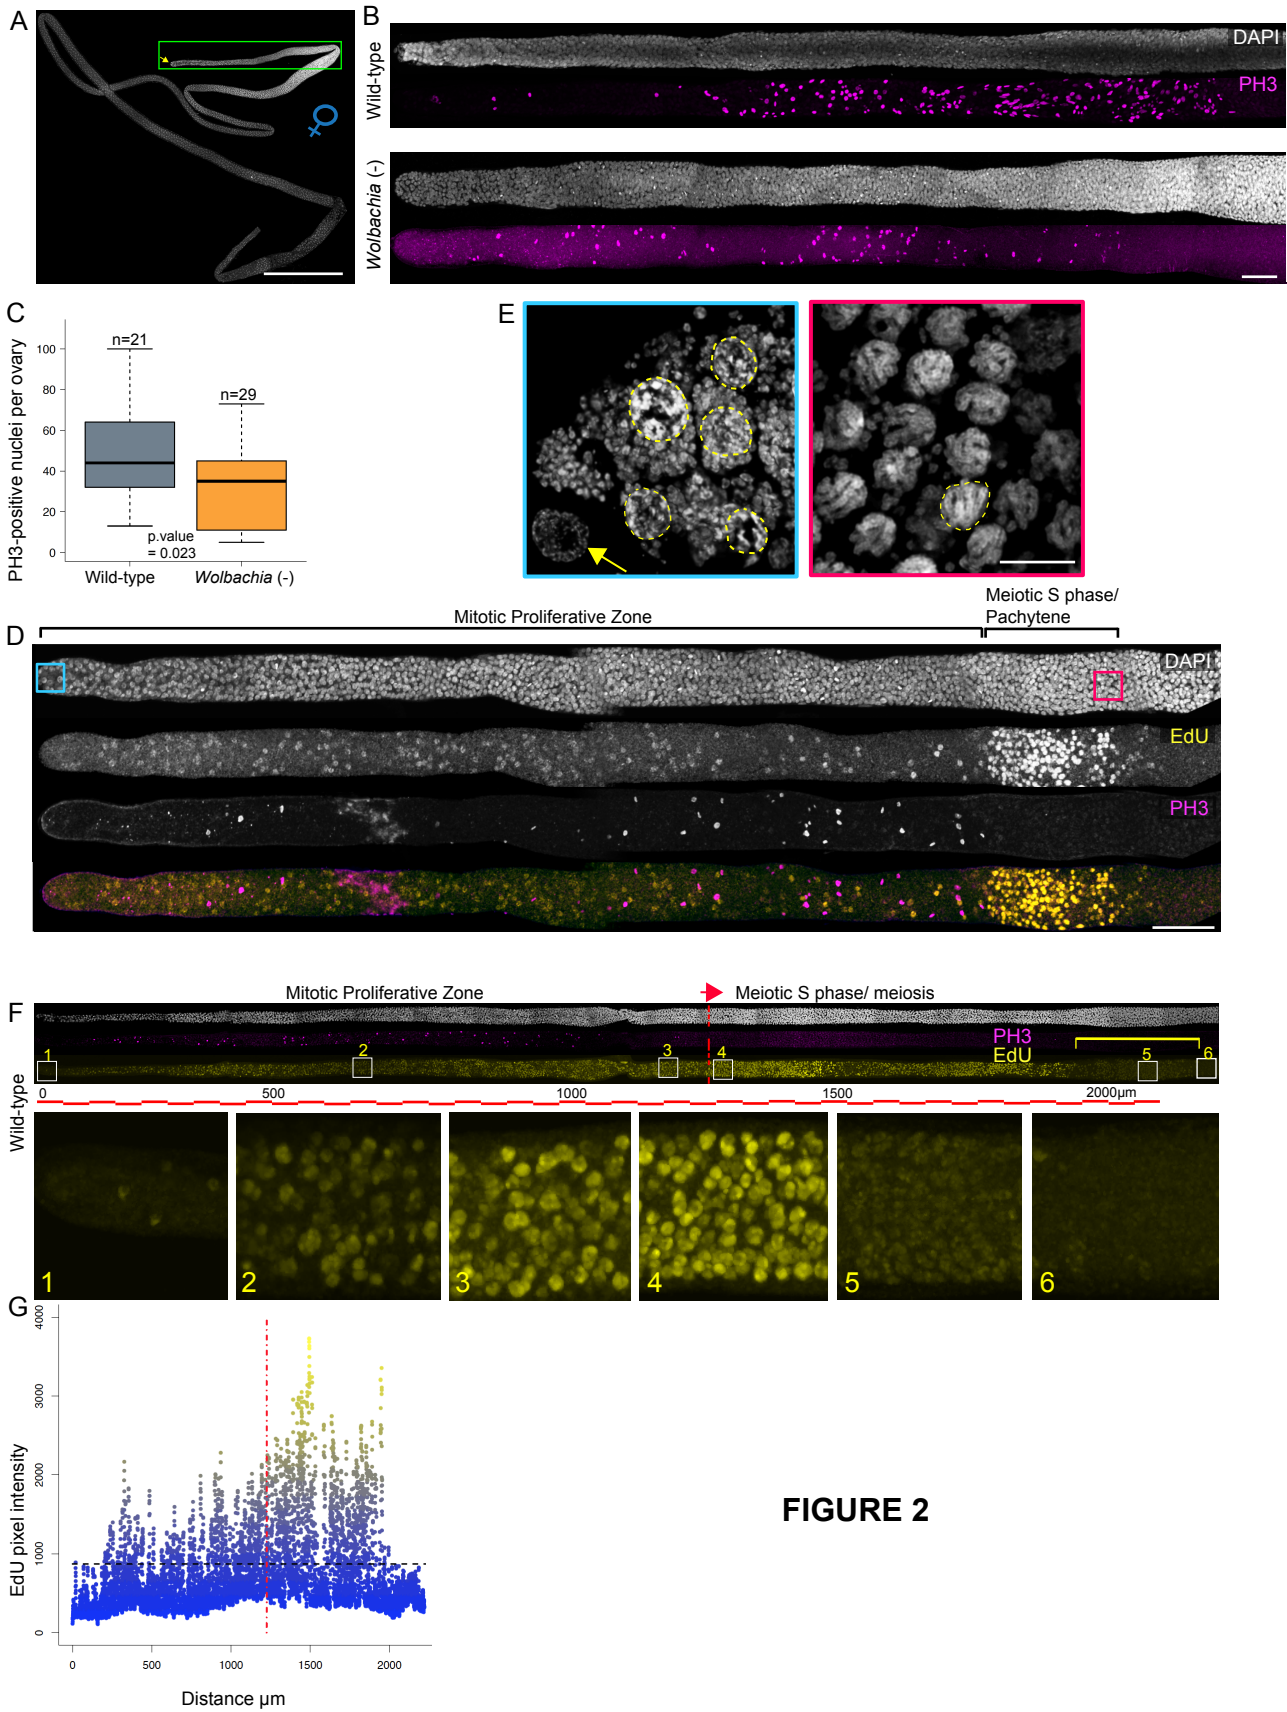

**FIGURE 2**



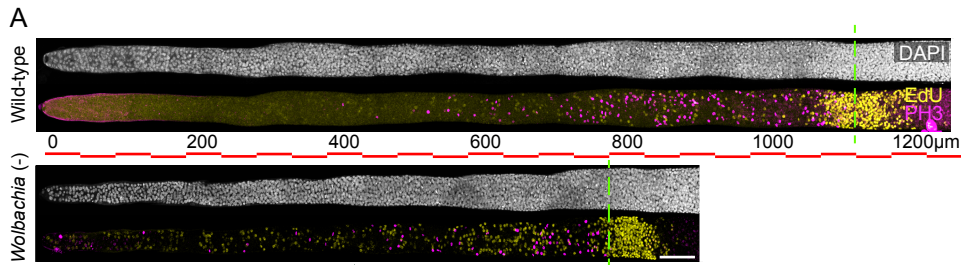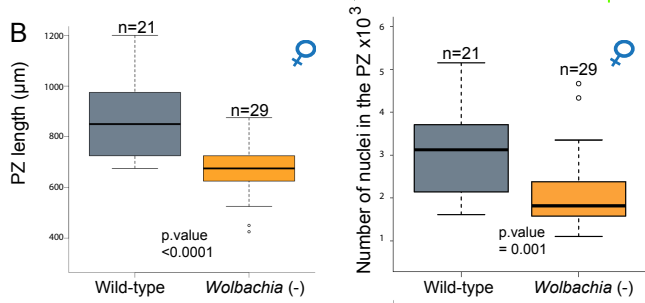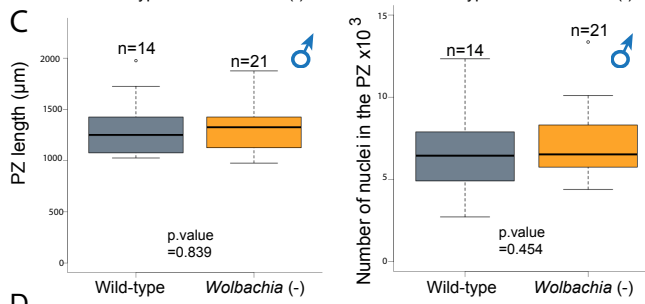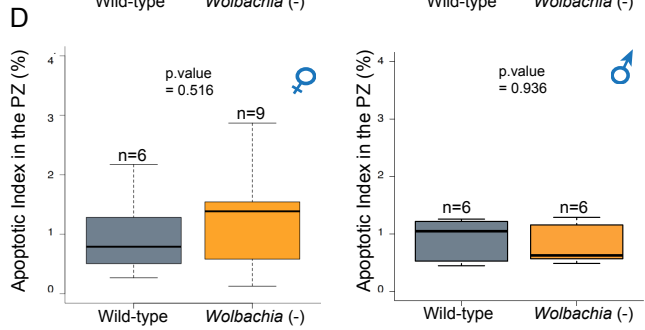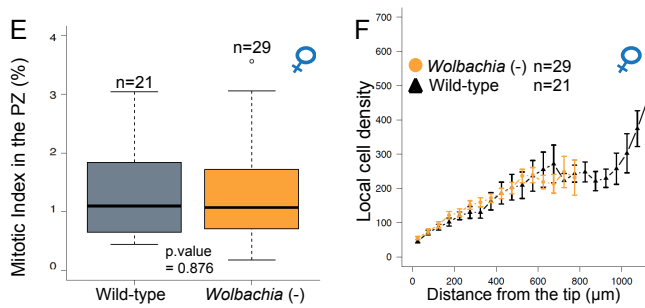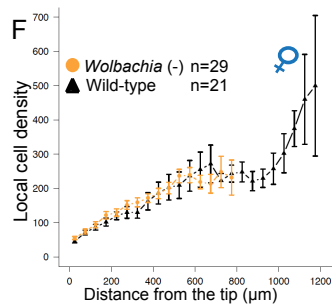

**FIGURE 3**

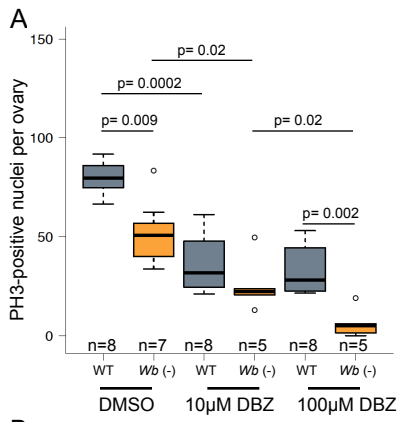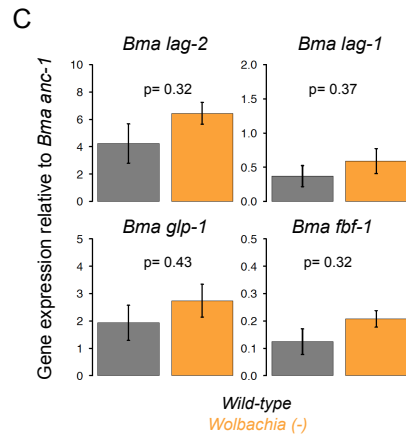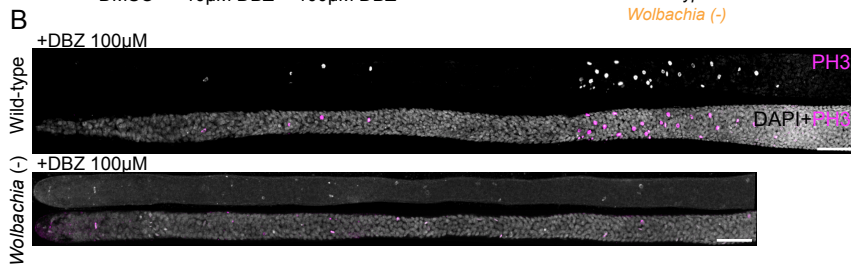

**FIGURE 4**

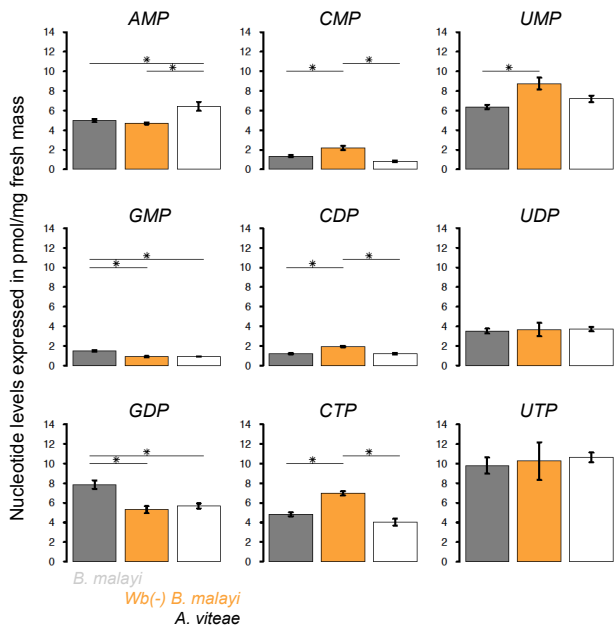

**FIGURE 5**

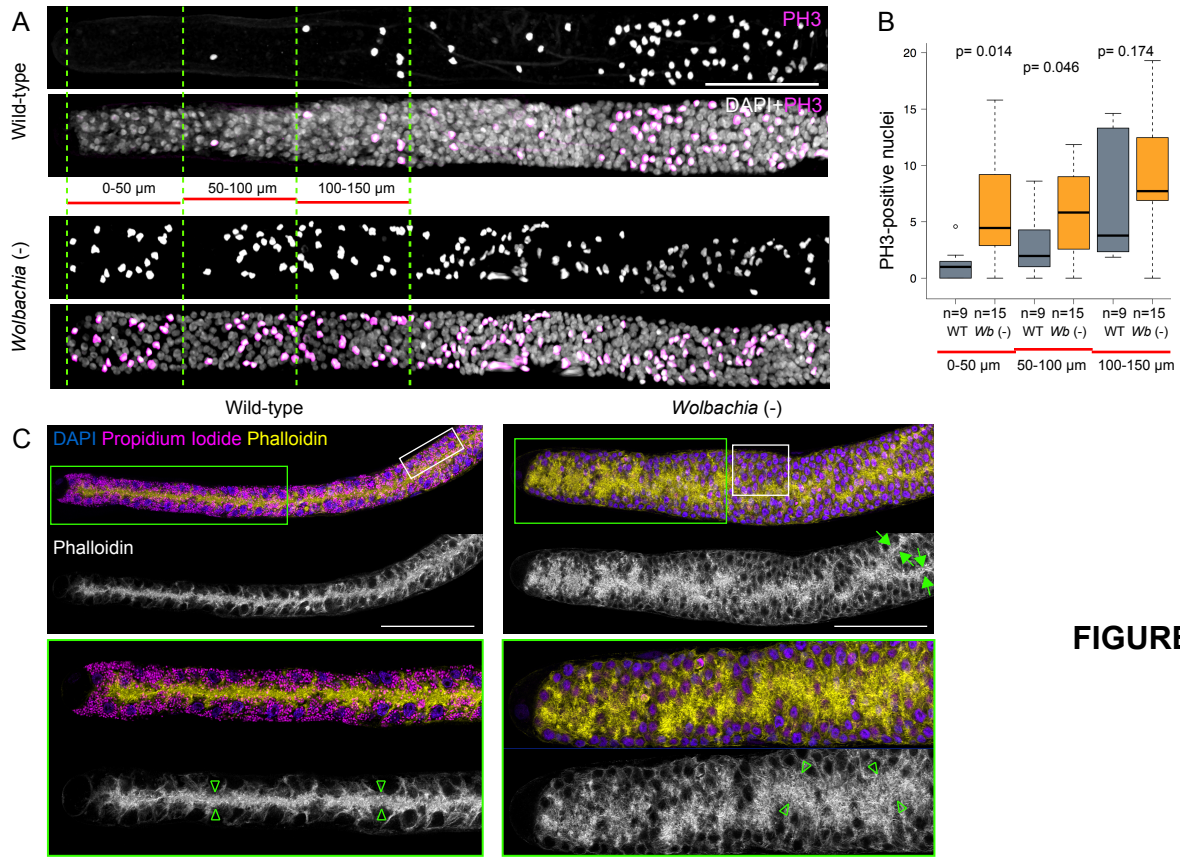

**FIGURE 6**

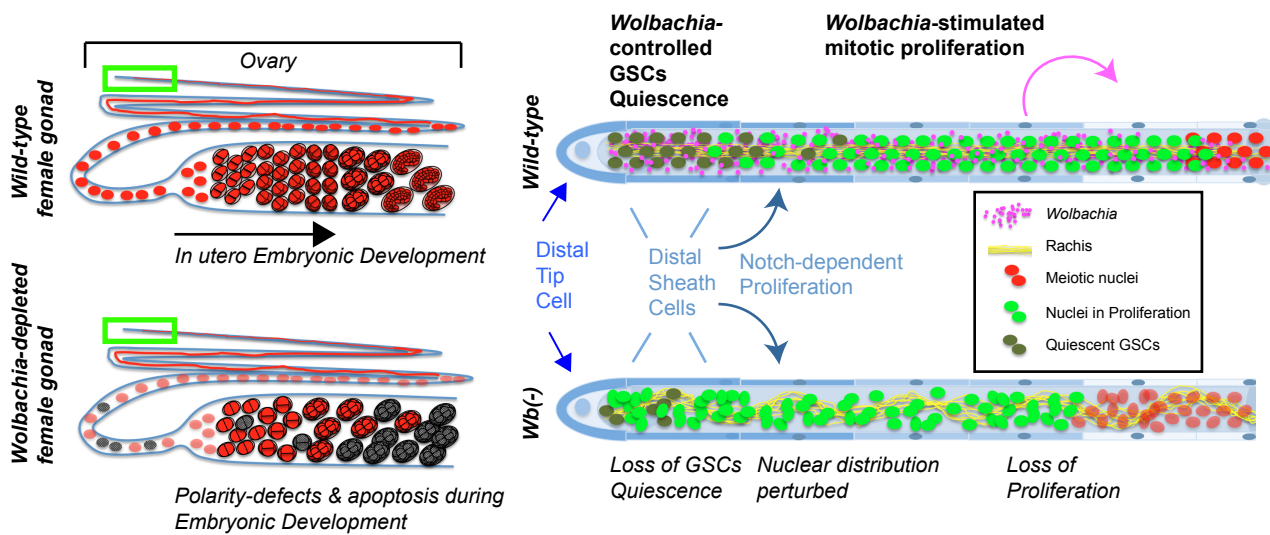

**FIGURE 7**
